# Supplementary material for: Climate change may increase the suitable habitats for invasive freshwater Cichlids in a Neotropical basin
Source: Research Square preprint supplement (doi:10.21203/rs.3.rs-5050398/v1), 2025-04-02
Supplement: Supplementary file 1 [file dd9f05a2f4e10df3355fe142.docx]

# Title:

Climate change may increase the suitable habitats for invasive freshwater Cichlids in a Neotropical basin.

### Author names and affiliations:

Cristian Martínez-González 1*[ccmartinez2@uc.cl](mailto:ccmartinez2@unal.edu.co)

Lúcia Aparecida de Fatima Mateus 2 [lafmateus@gmail.com](mailto:lafmateus@gmail.com)

Thadeu Sobral-Souza 3[thadeusobral@gmail.com](mailto:thadeusobral@gmail.com)

Yzel Rondon Súarez 4 [yzelrondonsuarez@gmail.com](mailto:yzelrondonsuarez@gmail.com)

Jerry Magno Ferreira Penha 2[jpenha.bio@gmail.com](mailto:jpenha.bio@gmail.com)

1 Graduate Program in Ecology and Biodiversity Conservation, Institute of Biological Sciences, Federal University of Mato Grosso, Av. Fernando Corrêa, 2367, Cuiabá, Mato Grosso, 78060-900, Brazil.

2 Laboratory of Ecology and Management of Fisheries Resources, Institute of Biological Sciences, Federal University of Mato Grosso, Cuiabá, Mato Grosso, Brazil, Av. Fernando Corrêa, 2367, Cuiabá, Mato Grosso, 78060-900, Brazil.

3 Department of Botany, Institute of Biological Sciences, Federal University of Mato Grosso, Cuiabá, Brazil, Av. Fernando Corrêa, 2367, Cuiabá, Mato Grosso, 78060-900, Brazil.

4 State University of Mato Grosso do Sul, Mato Grosso do Sul, Rod. Dourados-Itahum, Km 12, Dourados, Mato Grosso do Sul, 79804-970, Brazil.

### *Corresponding author:

Cristian Martínez-González [ccmartinez2@uc.cl](mailto:ccmartinez2@unal.edu.co)

**Supplementary Material:**

**SM-1a. Variance Inflation Factor** (**VIF**) values for selected hydroclimatic variables in the Br-UPRB + Nile basins for modeling the suitable habitats for *Oreochromis niloticus.*

| **Variables** | **Variable explanation** | **VIF** |
| --- | --- | --- |
| hydro_02 | Mean Diurnal Range (Mean of monthly (max temp - min temp)) | 2.864 |
| hydro_03 | Isothermality (BIO2/BIO7) (×100) | 3.278 |
| hydro_08 | Mean Temperature of Wettest Quarter | 1.629 |
| hydro_09 | Annual Precipitation | 1.338 |
| hydro_14 | Precipitation of Driest Month | 2.292 |
| hydro_15 | Precipitation Seasonality (Coefficient of Variation) | 2.953 |
| hydro_18 | Precipitation of Warmest Quarter | 3.076 |
| hydro_19 | Precipitation of Coldest Quarter | 2.679 |

**SM-1b. Variance Inflation Factor** (**VIF**) values for selected hydroclimatic variables in the Br-UPRB + Araguaia - Tocantins basins for modeling the suitable habitats for *Cichla spp.*

| **Variables** | **Variable explanation** | **VIF** |
| --- | --- | --- |
| hydro_02 | Mean Diurnal Range (Mean of monthly (max temp - min temp)) | 1.700 |
| hydro_04 | Temperature Seasonality (standard deviation ×100) | 4.833 |
| hydro_10 | Mean Temperature of Warmest Quarter | 1.109 |
| hydro_12 | Annual Precipitation | 3.439 |
| hydro_15 | Precipitation Seasonality (Coefficient of Variation) | 2.319 |
| hydro_18 | Precipitation of Warmest Quarter | 2.822 |
| hydro_19 | Precipitation of Coldest Quarter | 3.861 |

**SM-2a.** Environmental variables predictor for modeling *Oreochromis niloticus* habitat suitability.

These climatic data, used in several ENMs, are considered standard for modeling terrestrial and freshwater species distributions 4.

| **Variable name** | **Scenarios** | **SSP** | **Variable explanation** | **Aggregation** | **Unit** | **Type** | **Source** | **Resolution** | **Raster type** |
| --- | --- | --- | --- | --- | --- | --- | --- | --- | --- |
| dem_03 | Current; 2050 | - | Elevation range | range | [m] | Int32 | EarthEnv/HydroSHEDS | 30arcsec | .TIF |
| flow_02 | Current; 2050 | - | Number of upstream catchment grid cells | sum | count | Int32 | EarthEnv/HydroSHEDS | 30arcsec | .TIF |
| slope_avg | Current; 2050 | - | Slope range | range | [°] * 100 | Int32 | EarthEnv/HydroSHEDS | 30arcsec | .TIF |
| hydro_avg_02 | Current | - | Mean Diurnal Range (Mean of monthly (max temp - min temp)) | average | [°C] * 10 | Int32 | EarthEnv/HydroSHEDS | 30arcsec | .TIF |
| hydro_avg_03 | Current | - | Isothermality (BIO2/BIO7) (×100) | average | * 100 | Int32 | EarthEnv/HydroSHEDS | 30arcsec | .TIF |
| hydro_avg_08 | Current | - | Mean Temperature of Wettest Quarter | average | [°C] * 10 | Int32 | EarthEnv/HydroSHEDS | 30arcsec | .TIF |
| hydro_avg_09 | Current | - | Annual Precipitation | sum | [mm] | Float64 | EarthEnv/HydroSHEDS | 30arcsec | .TIF |
| hydro_avg_13 | Current | - | Precipitation of Wettest Month | sum | [mm] | Float64 | EarthsuarezEnv/HydroSHEDS | 30arcsec | .TIF |
| hydro_avg_14 | Current | - | Precipitation of Driest Month | sum | [mm] | Float64 | EarthEnv/HydroSHEDS | 30arcsec | .TIF |
| hydro_avg_15 | Current | - | Precipitation Seasonality (Coefficient of Variation) | sum | * 100 | Float64 | EarthEnv/HydroSHEDS | 30arcsec | .TIF |
| hydro_avg_18 | Current | - | Precipitation of Warmest Quarter | sum | [mm] | Float64 | EarthEnv/HydroSHEDS | 30arcsec | .TIF |
| hydro_avg_19 | Current | - | Precipitation of Coldest Quarter | sum | [mm] | Float64 | EarthEnv/HydroSHEDS | 30arcsec | .TIF |
| bio02_ensemble_ CMCC-ESM2_HadGEM3-GC31-LL | 2050 | 2 4.5 | Mean Diurnal Range (Mean of monthly (max temp - min temp)) | average | [°C] * 10 | Int32 | WorldClim7 | 30arcsec | .TIF |
| bio03_ensemble_ CMCC-ESM2_HadGEM3-GC31-LL | 2050 | 2 4.5 | Isothermality (BIO2/BIO7) (×100) | average | [°C] * 10 | Int32 | WorldClim7 | 30arcsec | .TIF |
| bio08_ensemble_ CMCC-ESM2_HadGEM3-GC31-LL | 2050 | 2 4.5 | Mean Temperature of Wettest Quarter | average | [°C] * 10 | Int32 | WorldClim7 | 30arcsec | .TIF |
| bio09_ensemble_ CMCC-ESM2_HadGEM3-GC31-LL | 2050 | 2 4.5 | Annual Precipitation | sum | [mm] | Float64 | WorldClim7 | 30arcsec | .TIF |
| bio13_ensemble_ CMCC-ESM2_HadGEM3-GC31-LL | 2050 | 2 4.5 | Precipitation of Wettest Month | sum | [mm] | Float64 | WorldClim7 | 30arcsec | .TIF |
| bio14_ensemble_ CMCC-ESM2_HadGEM3-GC31-LL | 2050 | 2 4.5 | Precipitation of Driest Month | sum | [mm] | Float64 | WorldClim7 | 30arcsec | .TIF |
| bio15_ensemble_ CMCC-ESM2_HadGEM3-GC31-LL | 2050 | 2 4.5 | Precipitation Seasonality (Coefficient of Variation) | sum | * 100 | Float64 | WorldClim7 | 30arcsec | .TIF |
| bio18_ensemble_ CMCC-ESM2_HadGEM3-GC31-LL | 2050 | 2 4.5 | Precipitation of Warmest Quarter | sum | [mm] | Float64 | WorldClim7 | 30arcsec | .TIF |
| bio19_ensemble_ CMCC-ESM2_HadGEM3-GC31-LL | 2050 | 2 4.5 | Precipitation of Coldest Quarter | sum | [mm] | Float64 | WorldClim7 | 30arcsec | .TIF |

**SM-2b.** Environmental variables predictor for modelling *Chila spp.* habitat suitability.

These climatic data, used in various ENMs, are considered standard for modeling freshwater species distributions 4.

| **Variable name** | **Scenarios** | **SSP** | **Variable explanation** | **Aggregation** | **Unit** | **Type** | **Source** | **Resolution** | **Raster type** |
| --- | --- | --- | --- | --- | --- | --- | --- | --- | --- |
| dem_03 | Current; 2050 | - | Elevation range | range | [m] | Int32 | EarthEnv/HydroSHEDS | 30arcsec | .TIF |
| flow_02 | Current; 2050 | - | Number of upstream catchment grid cells | sum | count | Int32 | EarthEnv/HydroSHEDS | 30arcsec | .TIF |
| slope_avg | Current; 2050 | - | Slope range | range | [°] * 100 | Int32 | EarthEnv/HydroSHEDS | 30arcsec | .TIF |
| hydro_avg_02 | Current | - | Mean Diurnal Range (Mean of monthly (max temp - min temp)) | average | [°C] * 10 | Int32 | EarthEnv/HydroSHEDS | 30arcsec | .TIF |
| hydro_avg_04 | Current | - | Temperature Seasonality (standard deviation ×100) | average | [°C] * 10 | Int32 | EarthEnv/HydroSHEDS | 30arcsec | .TIF |
| hydro_avg_10 | Current | - | Mean Temperature of Warmest Quarter | average | [°C] * 10 | Int32 | EarthEnv/HydroSHEDS | 30arcsec | .TIF |
| hydro_avg_12 | Current | - | Annual Precipitation | sum | [mm] | Float64 | EarthEnv/HydroSHEDS | 30arcsec | .TIF |
| hydro_avg_15 | Current | - | Precipitation Seasonality (Coefficient of Variation) | sum | * 100 | Float64 | EarthEnv/HydroSHEDS | 30arcsec | .TIF |
| hydro_avg_18 | Current | - | Precipitation of Warmest Quarter | sum | [mm] | Float64 | EarthEnv/HydroSHEDS | 30arcsec | .TIF |
| hydro_avg_19 | Current | - | Precipitation of Coldest Quarter | sum | [mm] | Float64 | EarthEnv/HydroSHEDS | 30arcsec | .TIF |
| bio02_ensemble_ CMCC-ESM2_HadGEM3-GC31-LL | 2050 | 2 4.5 | Mean Diurnal Range (Mean of monthly (max temp - min temp)) | average | [°C] * 10 | Int32 | WorldClim | 30arcsec | .TIF |
| bio04_ensemble_ CMCC-ESM2_HadGEM3-GC31-LL | 2050 | 2 4.5 | Temperature Seasonality (standard deviation ×100) | average | [°C] * 10 | Int32 | WorldClim | 30arcsec | .TIF |
| bio10_ensemble_ CMCC-ESM2_HadGEM3-GC31-LL | 2050 | 2 4.5 | Mean Temperature of Warmest Quarter | average | [°C] * 10 | Int32 | WorldClim | 30arcsec | .TIF |
| bio12_ensemble_ CMCC-ESM2_HadGEM3-GC31-LL | 2050 | 2 4.5 | Annual Precipitation | sum | [mm] | Float64 | WorldClim | 30arcsec | .TIF |
| bio15_ensemble_ CMCC-ESM2_HadGEM3-GC31-LL | 2050 | 2 4.5 | Precipitation Seasonality (Coefficient of Variation) | sum | * 100 | Float64 | WorldClim | 30arcsec | .TIF |
| bio18_ensemble_ CMCC-ESM2_HadGEM3-GC31-LL | 2050 | 2 4.5 | Precipitation of Warmest Quarter | sum | [mm] | Float64 | WorldClim | 30arcsec | .TIF |
| bio19_ensemble_ CMCC-ESM2_HadGEM3-GC31-LL | 2050 | 2 4.5 | Precipitation of Coldest Quarter | sum | [mm] | Float64 | WorldClim | 30arcsec | .TIF |

## SM-3a. Variable importance for each ensemble of ENMs of *Oreochromis niloticus* in current and future 2050 scenarios*.*

| **Variable name** | **Scenarios** | **SSP** | **Variable explanation** | **Variable weight** |
| --- | --- | --- | --- | --- |
| dem_03 | Current | - | Elevation range | 0.097 |
| flow_02 | Current | - | Number of upstream catchment grid cells | 0.074 |
| slope_avg | Current | - | Slope range | 0.027 |
| hydro_avg_02 | Current | - | Mean Diurnal Range (Mean of monthly (max temp - min temp)) | 0.159 |
| hydro_avg_03 | Current | - | Isothermality (BIO2/BIO7) (×100) | 0.084 |
| hydro_avg_08 | Current | - | Mean Temperature of Wettest Quarter | 0.193 |
| hydro_avg_09 | Current | - | Annual Precipitation | 0.044 |
| hydro_avg_14 | Current | - | Precipitation of Driest Month | 0.071 |
| hydro_avg_15 | Current | - | Precipitation Seasonality (Coefficient of Variation) | 0.11 |
| hydro_avg_18 | Current | - | Precipitation of Warmest Quarter | 0.078 |
| hydro_avg_19 | Current | - | Precipitation of Coldest Quarter | 0.063 |
| 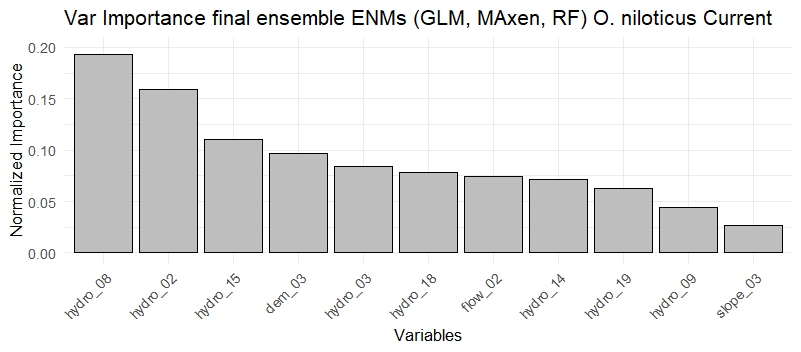 | | | | **1** |
| dem_03 | 2050 | - | Elevation range | 0.11 |
| flow_02 | 2050 | - | Number of upstream catchment grid cells | 0.01 |
| slope_avg | 2050 | - | Slope range | 0.02 |
| bio02_ensemble_ CMCC-ESM2_HadGEM3-GC31-LL | 2050 | 2 4.5 | Mean Diurnal Range (Mean of monthly (max temp - min temp)) | 0.03 |
| bio03_ensemble_ CMCC-ESM2_HadGEM3-GC31-LL | 2050 | 2 4.5 | Isothermality (BIO2/BIO7) (×100) | 0.135 |
| bio08_ensemble_ CMCC-ESM2_HadGEM3-GC31-LL | 2050 | 2 4.5 | Mean Temperature of Wettest Quarter | 0.18 |
| bio09_ensemble_ CMCC-ESM2_HadGEM3-GC31-LL | 2050 | 2 4.5 | Annual Precipitation | 0.03 |
| bio14_ensemble_ CMCC-ESM2_HadGEM3-GC31-LL | 2050 | 2 4.5 | Precipitation of Driest Month | 0.035 |
| bio15_ensemble_ CMCC-ESM2_HadGEM3-GC31-LL | 2050 | 2 4.5 | Precipitation Seasonality (Coefficient of Variation) | 0.1 |
| bio18_ensemble_ CMCC-ESM2_HadGEM3-GC31-LL | 2050 | 2 4.5 | Precipitation of Warmest Quarter | 0.27 |
| bio19_ensemble_ CMCC-ESM2_HadGEM3-GC31-LL | 2050 | 2 4.5 | Precipitation of Coldest Quarter | 0.08 |
| 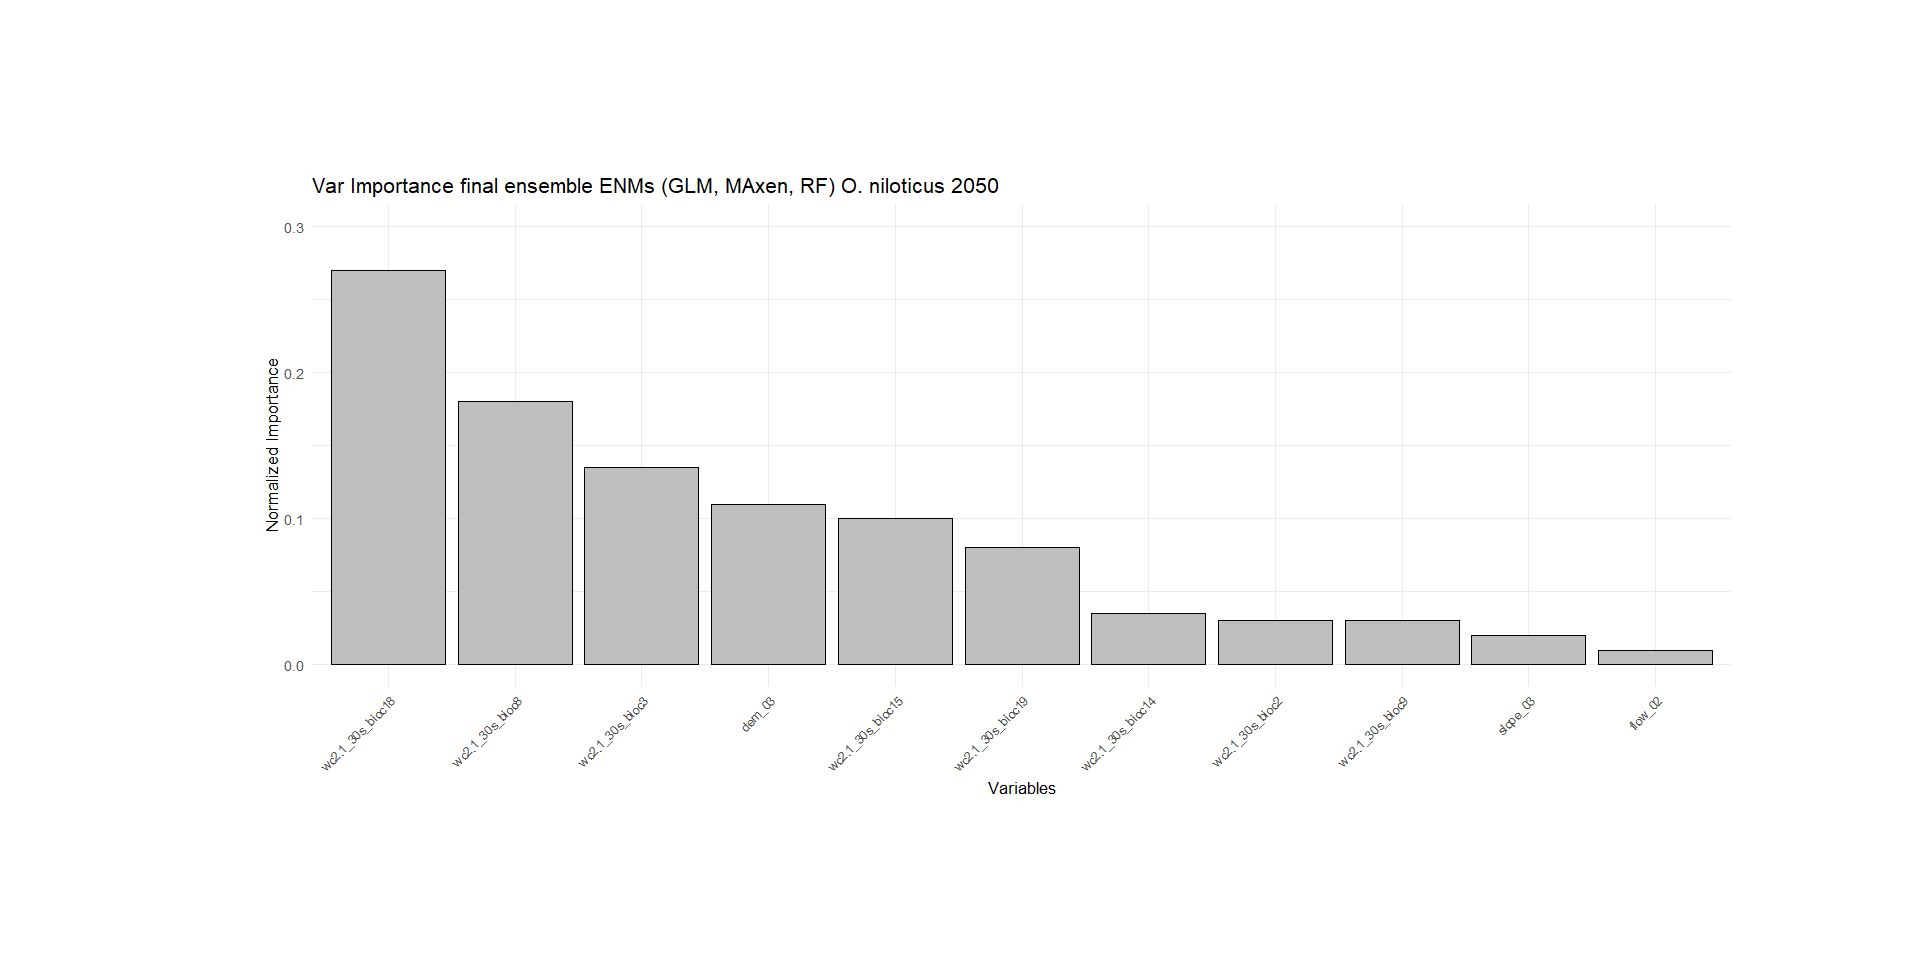 | | | | **1** |

## SM-3b. Variable importance for each ensemble of ENMs of *Cichla kelberi* in current and future 2050 scenarios*.*

| **Variable name** | **Scenarios** | **SSP** | **Variable explanation** | **Variable weight** |
| --- | --- | --- | --- | --- |
| dem_03 | Current | - | Elevation range | 0.064 |
| flow_02 | Current | - | Number of upstream catchment grid cells | 0.098 |
| slope_avg | Current | - | Slope range | 0.063 |
| hydro_avg_02 | Current | - | Mean Diurnal Range (Mean of monthly (max temp - min temp)) | 0.043 |
| hydro_avg_04 | Current | - | Temperature Seasonality (standard deviation ×100) | 0.158 |
| hydro_avg_10 | Current | - | Mean Temperature of Warmest Quarter | 0.153 |
| hydro_avg_12 | Current | - | Annual Precipitation | 0.104 |
| hydro_avg_15 | Current | - | Precipitation Seasonality (Coefficient of Variation) | 0.186 |
| hydro_avg_18 | Current | - | Precipitation of Warmest Quarter | 0.103 |
| hydro_avg_19 | Current | - | Precipitation of Coldest Quarter | 0.028 |
| 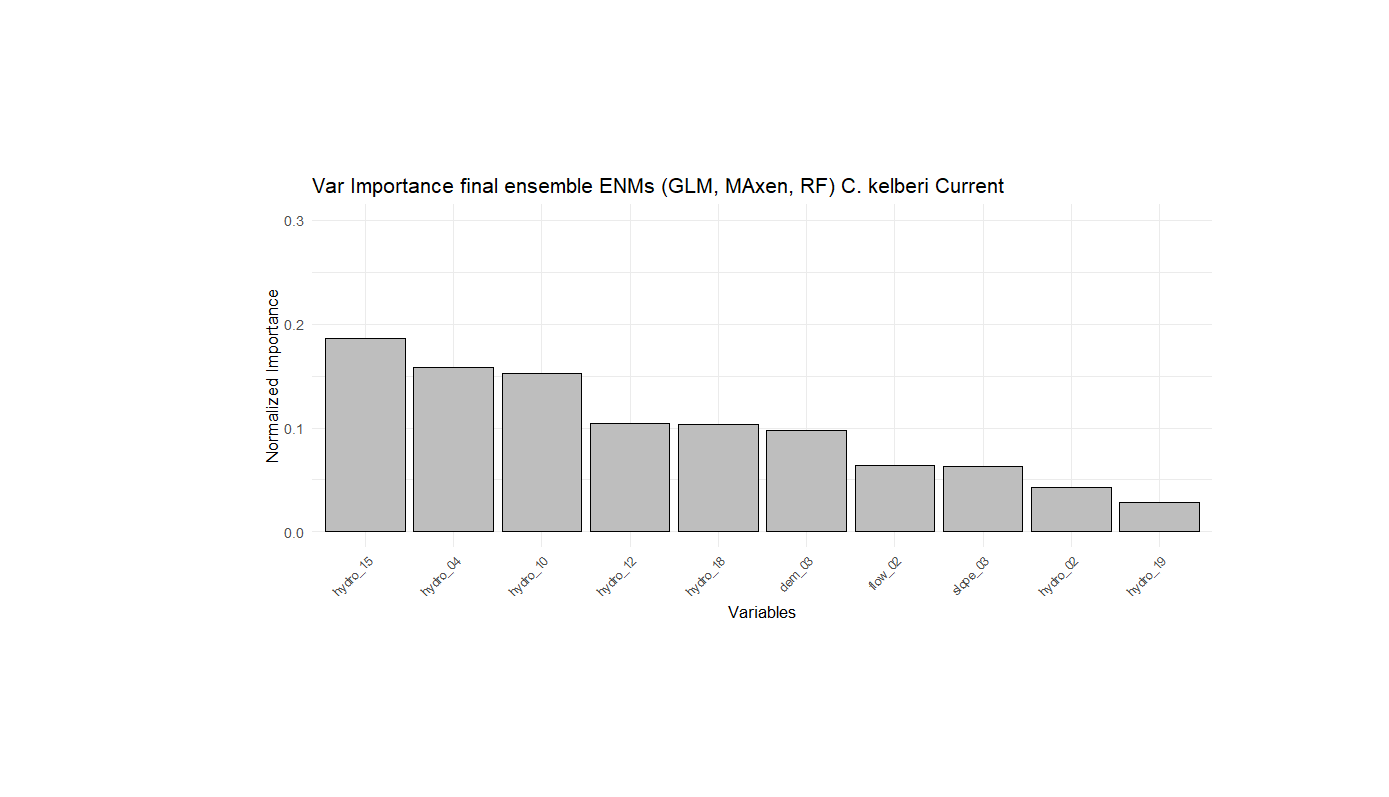 | | | | 1 |
| dem_03 | 2050 | - | Elevation range | 0.1161 |
| flow_02 | 2050 | - | Number of upstream catchment grid cells | 0.0143 |
| slope_avg | 2050 | - | Slope range | 0.0619 |
| bio02_ensemble_ CMCC-ESM2_HadGEM3-GC31-LL | 2050 | 2 4.5 | Mean Diurnal Range (Mean of monthly (max temp - min temp)) | 0.0695 |
| bio04_ensemble_ CMCC-ESM2_HadGEM3-GC31-LL | 2050 | 2 4.5 | Temperature Seasonality (standard deviation ×100) | 0.2592 |
| bio10_ensemble_ CMCC-ESM2_HadGEM3-GC31-LL | 2050 | 2 4.5 | Mean Temperature of Warmest Quarter | 0.1371 |
| bio12_ensemble_ CMCC-ESM2_HadGEM3-GC31-LL | 2050 | 2 4.5 | Annual Precipitation | 0.0352 |
| bio15_ensemble_ CMCC-ESM2_HadGEM3-GC31-LL | 2050 | 2 4.5 | Precipitation Seasonality (Coefficient of Variation) | 0.2235 |
| bio18_ensemble_ CMCC-ESM2_HadGEM3-GC31-LL | 2050 | 2 4.5 | Precipitation of Warmest Quarter | 0.0832 |
| 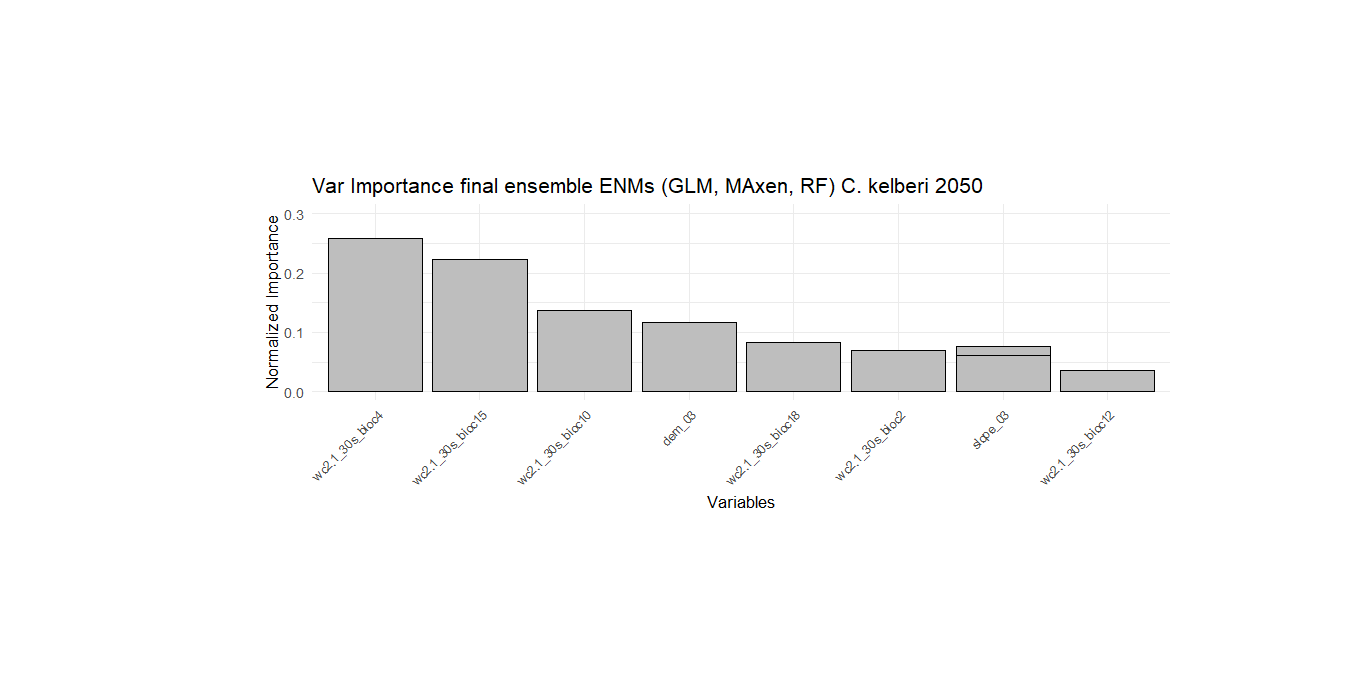 | | | | 1 |

## SM-3c. Variable importance for each ensemble of ENMs of *Cichla piquiti* in current and future 2050 scenarios*.*

| **Variable name** | **Scenarios** | **SSP** | **Variable explanation** | **Variable weight** |
| --- | --- | --- | --- | --- |
| dem_03 | Current | - | Elevation range | 0.065 |
| flow_02 | Current | - | Number of upstream catchment grid cells | 0.075 |
| slope_avg | Current | - | Slope range | 0.025 |
| hydro_avg_02 | Current | - | Mean Diurnal Range (Mean of monthly (max temp - min temp)) | 0.1615 |
| hydro_avg_04 | Current | - | Temperature Seasonality (standard deviation ×100) | 0.145 |
| hydro_avg_10 | Current | - | Mean Temperature of Warmest Quarter | 0.035 |
| hydro_avg_12 | Current | - | Annual Precipitation | 0.085 |
| hydro_avg_15 | Current | - | Precipitation Seasonality (Coefficient of Variation) | 0.275 |
| hydro_avg_18 | Current | - | Precipitation of Warmest Quarter | 0.095 |
| hydro_avg_19 | Current | - | Precipitation of Coldest Quarter | 0.015 |
| 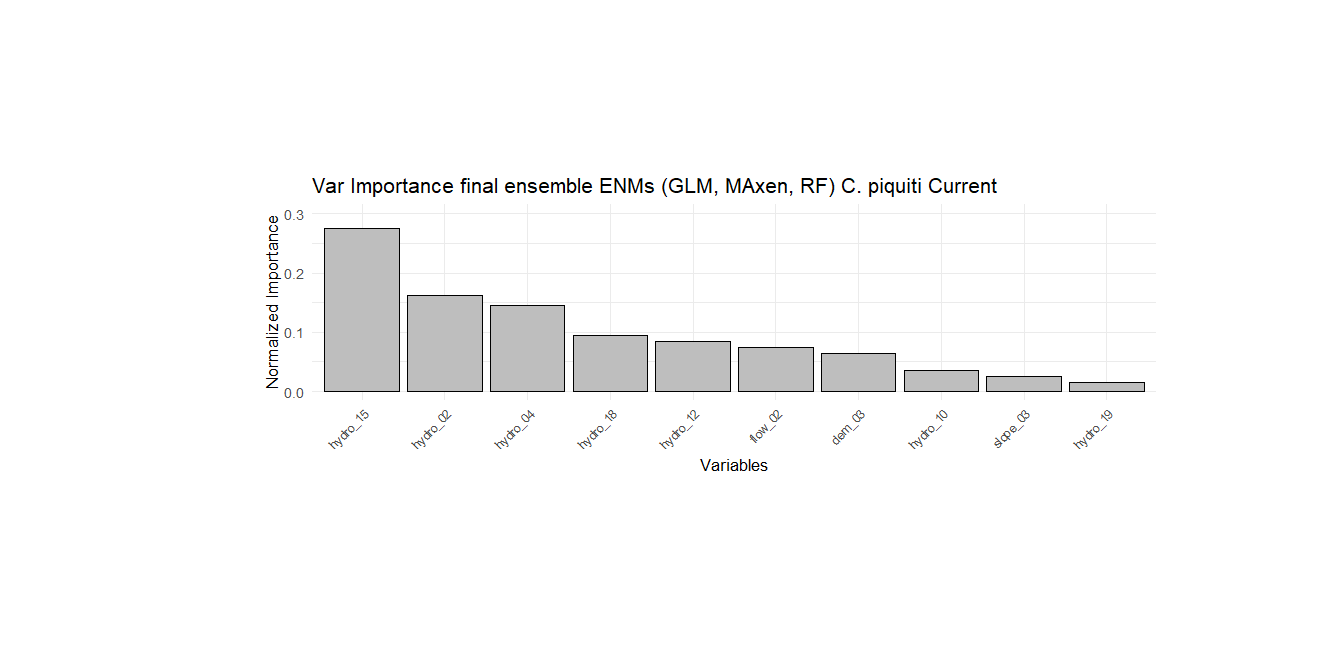 | | | |  |
| dem_03 | 2050 | - | Elevation range | 0.008 |
| flow_02 | 2050 | - | Number of upstream catchment grid cells | 0.175 |
| slope_avg | 2050 | - | Slope range | 0.053 |
| bio02_ensemble_ CMCC-ESM2_HadGEM3-GC31-LL | 2050 | 2 4.5 | Mean Diurnal Range (Mean of monthly (max temp - min temp)) | 0.159 |
| bio04_ensemble_ CMCC-ESM2_HadGEM3-GC31-LL | 2050 | 2 4.5 | Temperature Seasonality (standard deviation ×100) | 0.053 |
| bio10_ensemble_ CMCC-ESM2_HadGEM3-GC31-LL | 2050 | 2 4.5 | Mean Temperature of Warmest Quarter | 0.043 |
| bio12_ensemble_ CMCC-ESM2_HadGEM3-GC31-LL | 2050 | 2 4.5 | Annual Precipitation | 0.066 |
| bio15_ensemble_ CMCC-ESM2_HadGEM3-GC31-LL | 2050 | 2 4.5 | Precipitation Seasonality (Coefficient of Variation) | 0.363 |
| bio18_ensemble_ CMCC-ESM2_HadGEM3-GC31-LL | 2050 | 2 4.5 | Precipitation of Warmest Quarter | 0.007 |
| 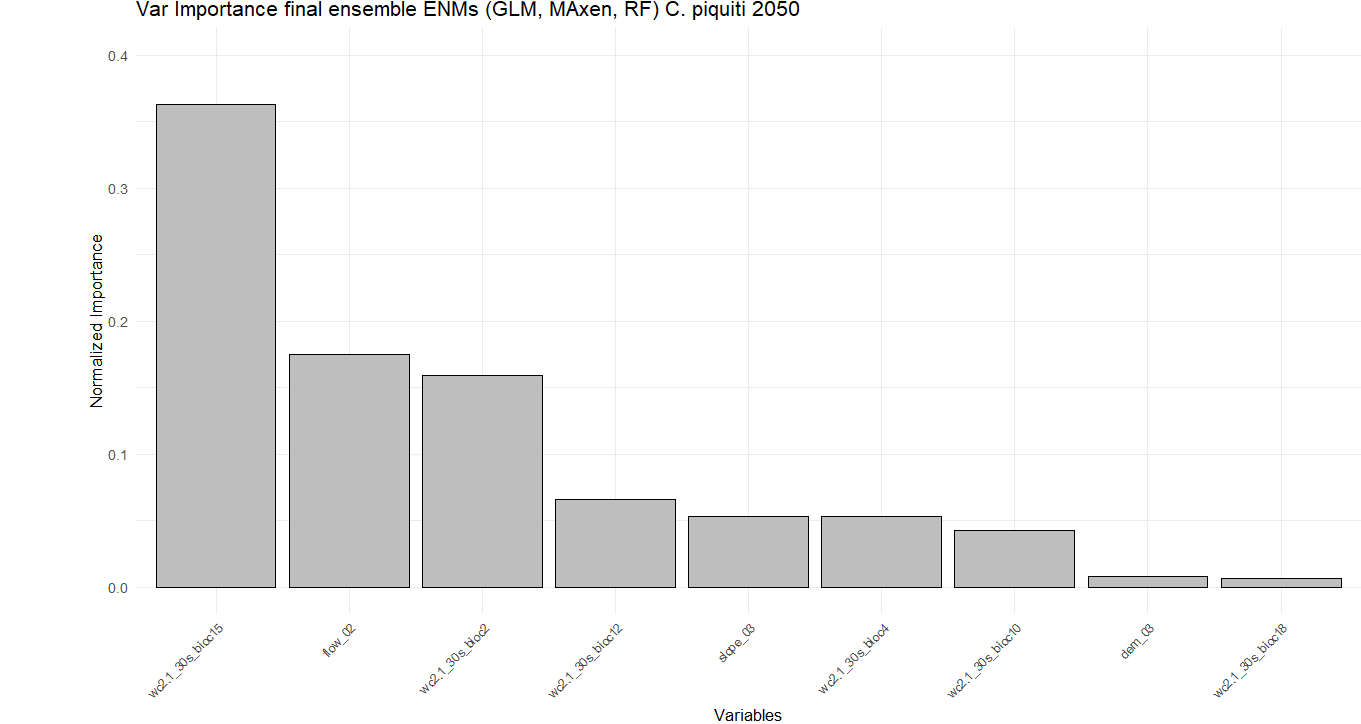 | | | | 1 |

## SM-4. TTS and AUC cabration and validation values for each ENMs algorithm: Generalized Linear Models (GLM), Random Forest (RF), and Maximum Entropy (MaxEnt).

| **Species** | **Scenario** | **Calibration** |
| --- | --- | --- |
| *Oreochromis niloticus* | Current  Calibration | 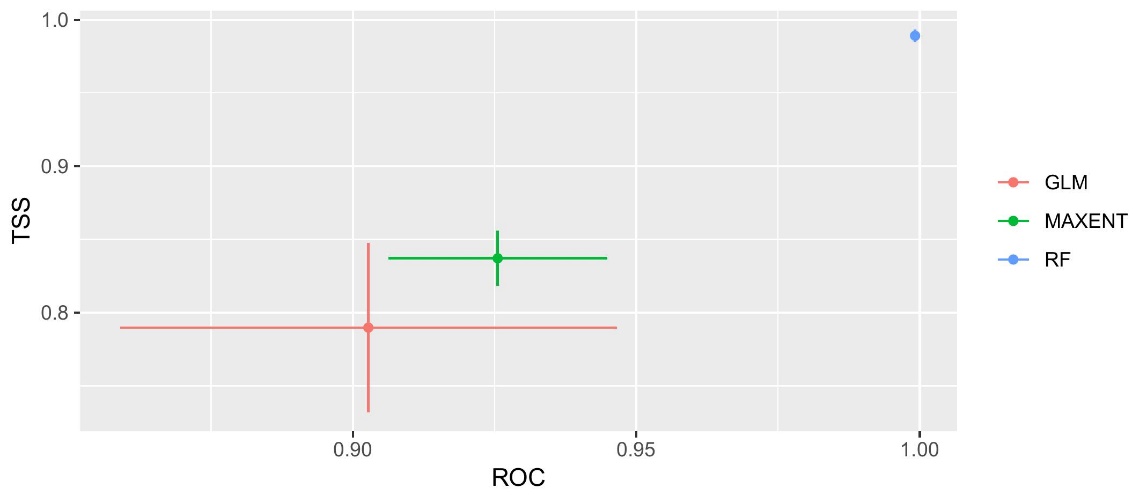 |
| Current  Validation | 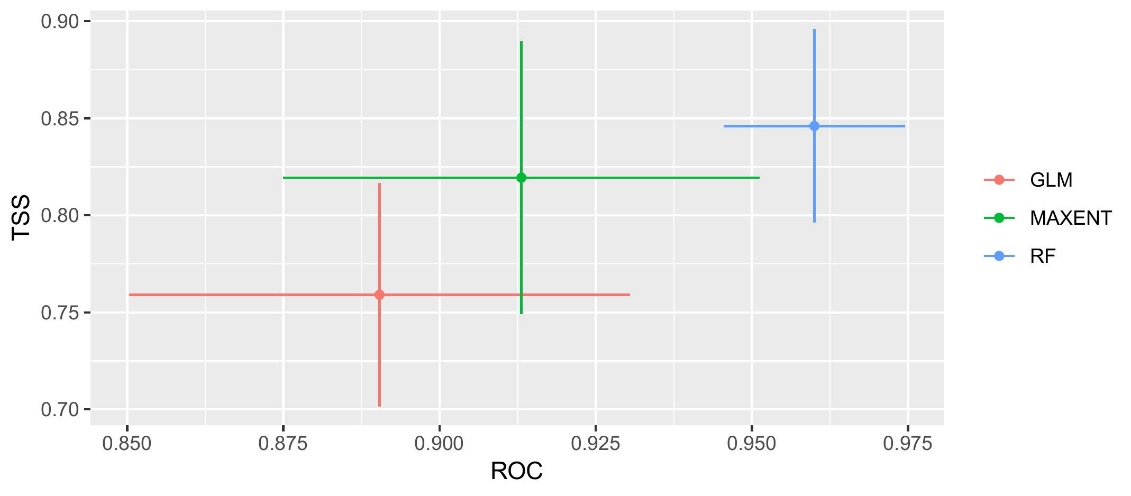 |
| 2050  (SSP2 4.5)  Calibration | 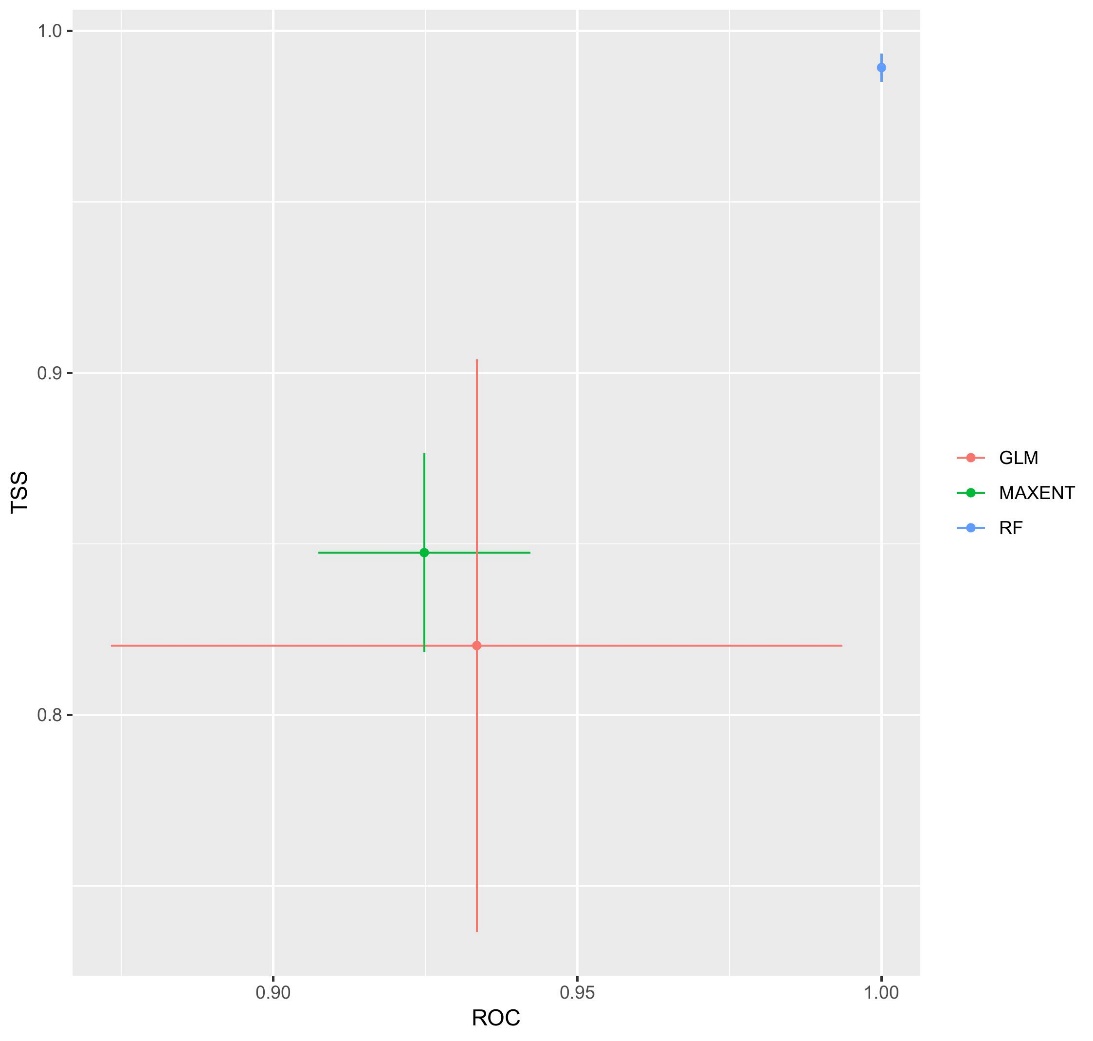 |
| 2050  (SSP2 4.5)  Validation | 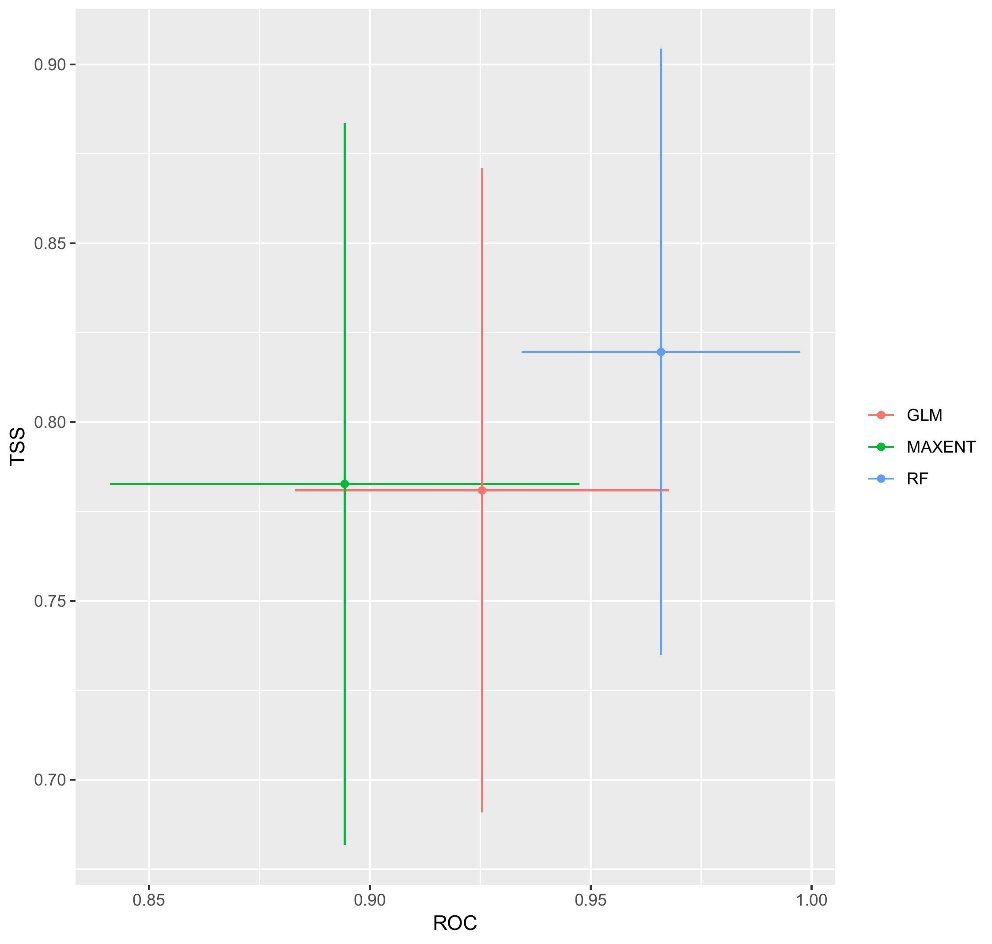 |
| *Cichla kelberi* | Current  Calibration | 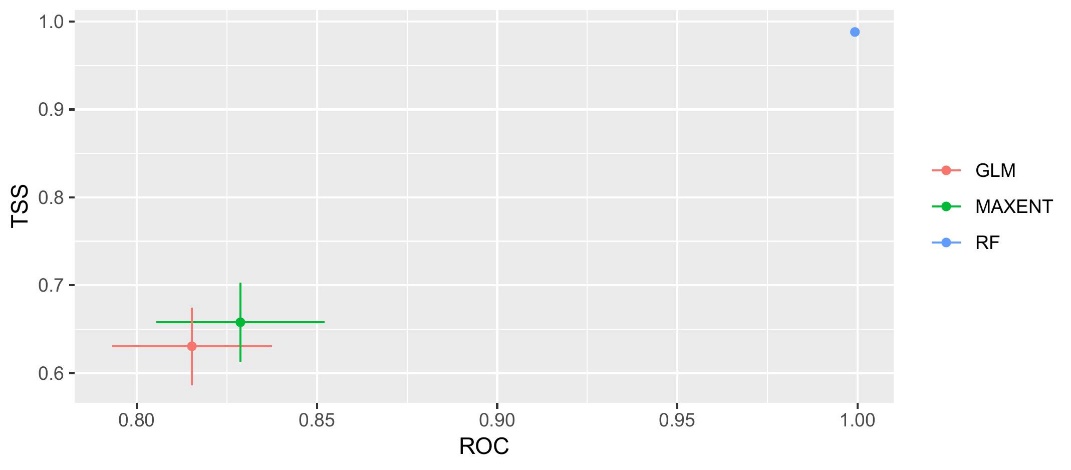 |
| Current  Validation | 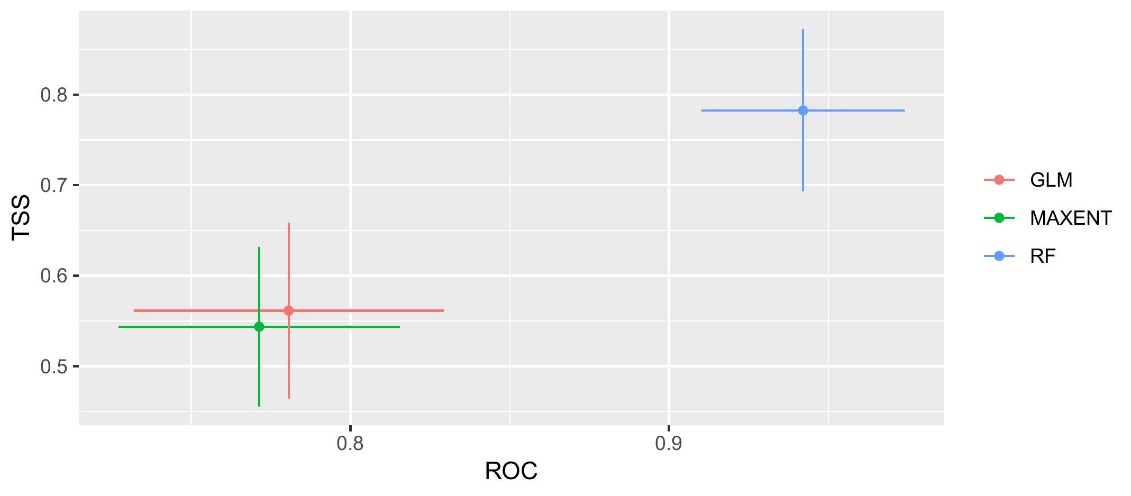 |
| 2050  (SSP2 4.5)  Calibration | 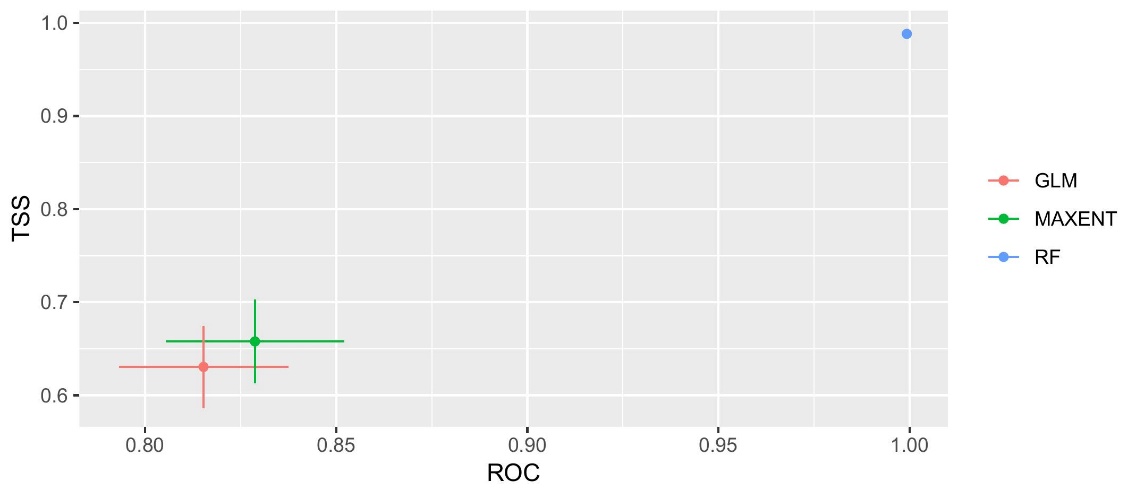 |
| 2050  (SSP2 4.5)  Validation | 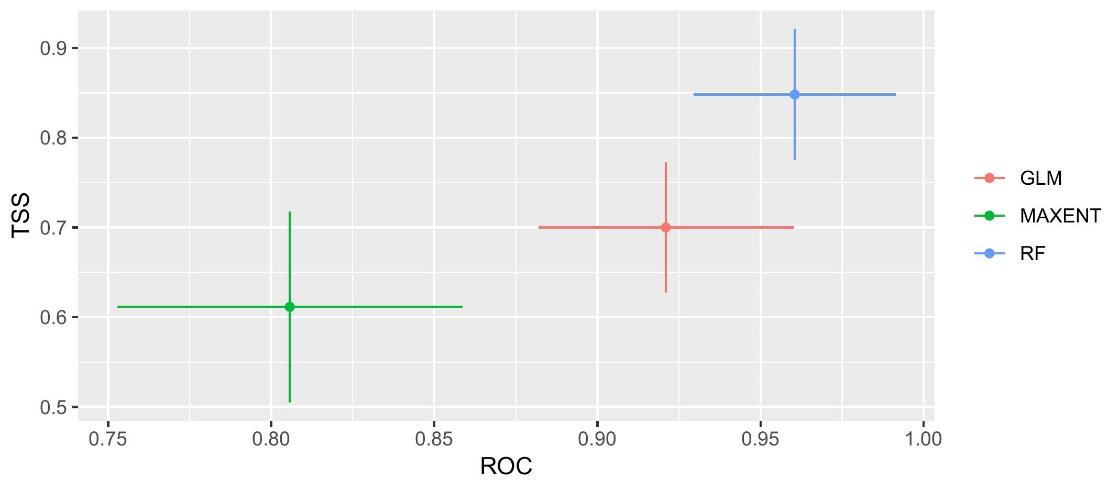 |
| *Cichla piquiti* | Current  Calibration | 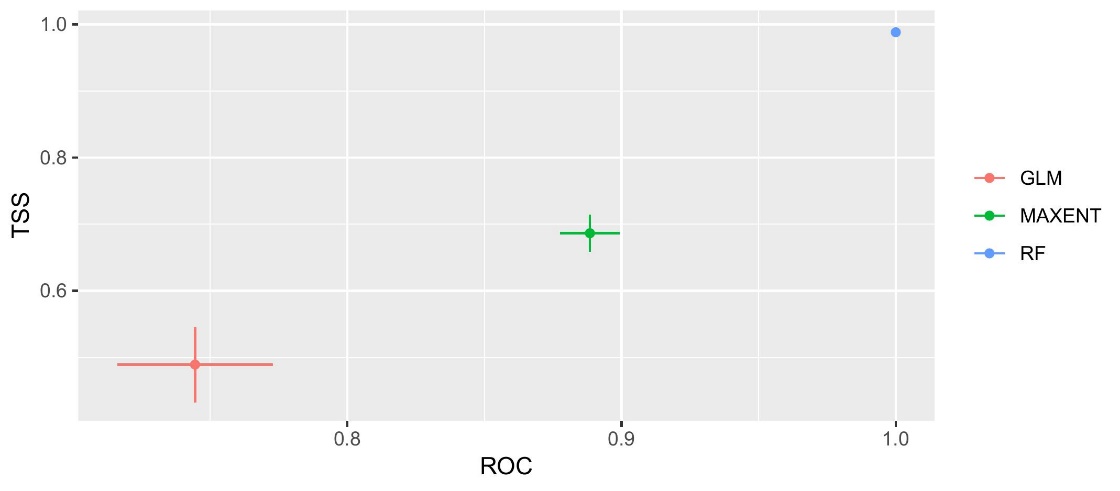 |
| Current  Validation | 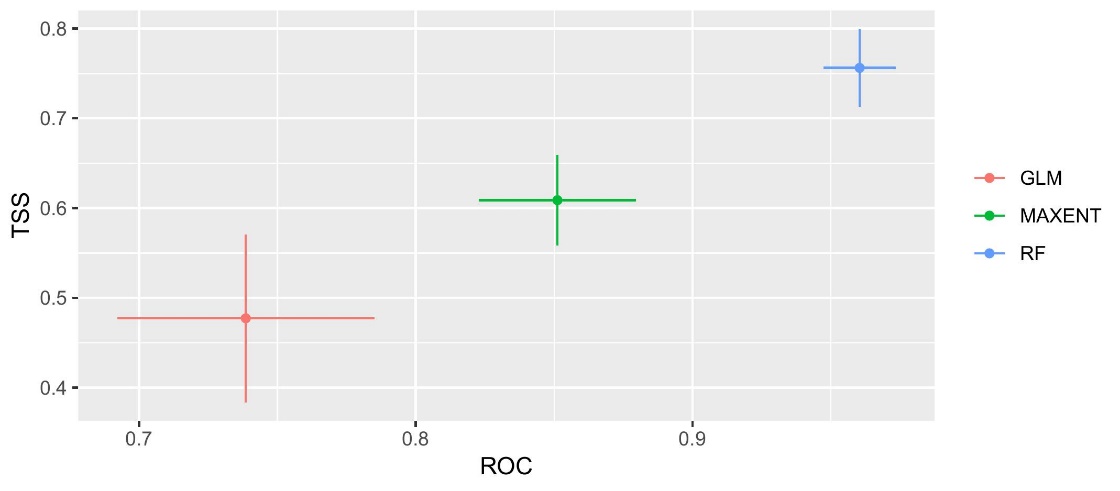 |
| 2050  (SSP2 4.5)  Calibration | 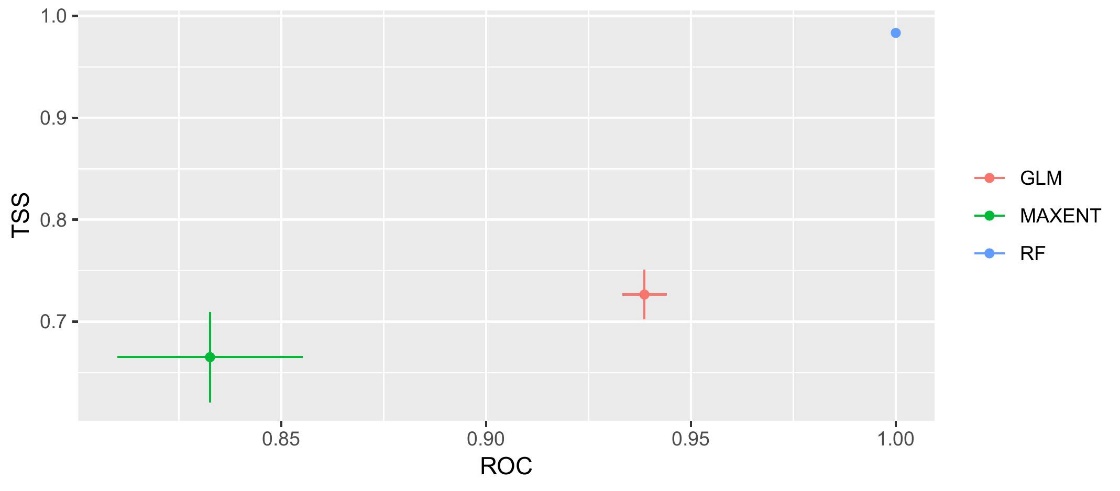 |
| 2050  (SSP2 4.5)  Validation | 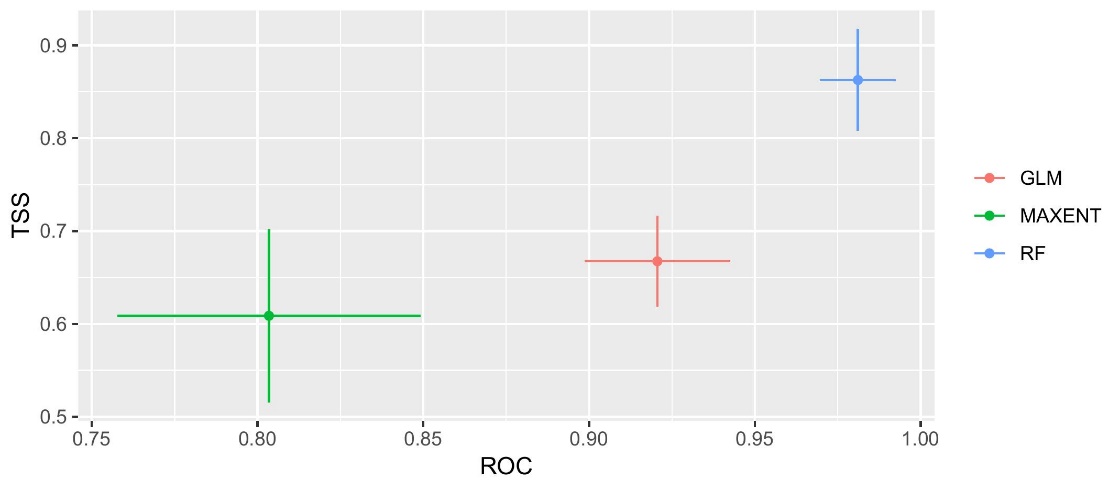 |

## SM-5. Species data / Occurrence database

Fish presence data were collected from diverse sources, including online databases like the Global Biodiversity Information Facility (GBIF; <http://www.gbif.org>), Species Link (<http://www.splink.org.br>), FishBase (<http://www.fishbase.org/search.php>), and FishNet2 (<http://www.fishnet2.net/>). Additionally, direct records were obtained from ichthyology research groups operating within the Brazilian portion of the Upper Paraguay River Basin (BR-UPRB). The contribution of data came from the Laboratory of Ecology and Management of Fisheries Resources (LEMARPE) at the Universidade Federal de Mato Grosso in Mato Grosso, Brazil, and from the Reports of Diagnostic of ichthyofauna, ichthyoplankton, and fisheries in the Paraguay River basin. The data collection was part of a research project focused on assessing the impacts of hydroelectric project implementation in the Paraguay River Hydrographic Region, funded by the National Water Agency (ANA) in 2018 1.

The dataset underwent a rigorous review, including removing ambiguous, duplicate, or unreliable records. Entries lacking precise geographical location or taxonomic information were also excluded from the dataset. We follow the taxonomic classification of Kullander & Ferreira (2006)2, and Eschmeyer's Catalog of Fishes (<https://researcharchive.calacademy.org>). We spatially thinned the occurrence localities by 1 km2 to minimize a clustering of records due to biased sampling by using the script "Snap points" by Domisch *et al.* (2015)3 <https://github.com/domisch/stream_layers/blob/master/snap_points.R>. We considered a total of 907 occurrence records of 3 freshwater fish IAS introduced in the basin. The coordinates of fish records were reported using a Garmin® Map-62s GPS device in the CSG-WGS-84 geographic coordinate reference system. Ocurrence records are available in the Figshare repository: <https://doi.org/10.6084/m9.figshare.26961754> and the following table:

| **ID** | **Longitude** | **Latitude** | **Spp.** | **date** | **Source_reference** |
| --- | --- | --- | --- | --- | --- |
| 1 | -57.95208333 | -15.90208333 | *Cichla kelberi* | 7-31-2008 | Biological colections UFMT UFMS |
| 2 | -58.23125 | -16.76041667 | *Cichla kelberi* | 6-14-2013 | Biological colections UFMT UFMS |
| 3 | -59.28958333 | -16.12291667 | *Cichla kelberi* | 8-27-2016 | Biological colections UFMT UFMS |
| 4 | -57.88541667 | -15.79375 | *Cichla kelberi* | 8-25-2006 | Biological colections UFMT UFMS |
| 5 | -57.70493878 | -16.00077211 | *Cichla kelberi* | 12-5-2011 | Biological colections UFMT UFMS |
| 6 | -59.11263078 | -16.25403588 | *Cichla kelberi* | 8-6-2008 | Biological colections UFMT UFMS |
| 7 | -57.984823 | -15.7103 | *Cichla kelberi* | 11-19-1992 | Biological colections UFMT UFMS |
| 8 | -58.31041667 | -15.91875 | *Cichla kelberi* | 11-20-1992 | Biological colections UFMT UFMS |
| 9 | -56.43720675 | -17.00387342 | *Cichla piquiti* | 5-18-1994 | Biological colections UFMT UFMS |
| 10 | -56.33961983 | -16.97708333 | *Cichla piquiti* | 5-18-1994 | Biological colections UFMT UFMS |
| 11 | -56.53125 | -17.31875 | *Cichla piquiti* | 5-18-1994 | Biological colections UFMT UFMS |
| 12 | -57.39375 | -17.39791667 | *Cichla piquiti* | 6-22-1994 | Biological colections UFMT UFMS |
| 13 | -56.27579811 | -17.24663144 | *Cichla piquiti* | 6-30-1994 | Biological colections UFMT UFMS |
| 14 | -56.4957416 | -17.29592507 | *Cichla piquiti* | 6-30-1994 | Biological colections UFMT UFMS |
| 15 | -56.7204736 | -17.30869307 | *Cichla piquiti* | 6-30-1994 | Biological colections UFMT UFMS |
| 16 | -57.13958333 | -17.31875 | *Cichla piquiti* | 6-30-1994 | Biological colections UFMT UFMS |
| 17 | -56.58875391 | -16.98875391 | *Cichla piquiti* | 6-30-1994 | Biological colections UFMT UFMS |
| 18 | -56.33541667 | -16.94791667 | *Cichla piquiti* | 7-2-1994 | Biological colections UFMT UFMS |
| 19 | -56.82708333 | -17.38958333 | *Cichla piquiti* | 7-2-1994 | Biological colections UFMT UFMS |
| 20 | -57.07285849 | -16.41041667 | *Cichla piquiti* | 11-1-2008 | Biological colections UFMT UFMS |
| 21 | -56.5506279 | -15.2881279 | *Cichla piquiti* | 11-2-2008 | Biological colections UFMT UFMS |
| 22 | -55.68958333 | -17.37146027 | *Cichla piquiti* | 11-4-2008 | Biological colections UFMT UFMS |
| 23 | -55.22904562 | -17.31654562 | *Cichla piquiti* | 11-5-2008 | Biological colections UFMT UFMS |
| 24 | -56.73958333 | -17.31041667 | *Cichla piquiti* | 11-6-2008 | Biological colections UFMT UFMS |
| 25 | -54.50694444 | -17.35555556 | *Cichla piquiti* | 11-7-2008 | Biological colections UFMT UFMS |
| 26 | -55.0655873 | -17.56975397 | *Cichla piquiti* | 11-8-2008 | Biological colections UFMT UFMS |
| 27 | -54.97894 | -17.62894 | *Cichla piquiti* | 11-1-1992 | Biological colections UFMT UFMS |
| 28 | -55.53077045 | -17.29743712 | *Cichla piquiti* | 11-2-1992 | Biological colections UFMT UFMS |
| 29 | -55.97195444 | -17.25208333 | *Cichla piquiti* | 11-3-1992 | Biological colections UFMT UFMS |
| 30 | -57.383 | -19.03125 | *Cichla piquiti* | 11-4-1992 | Biological colections UFMT UFMS |
| 31 | -57.40625 | -18.41041667 | *Cichla piquiti* | 11-5-1992 | Biological colections UFMT UFMS |
| 32 | -57.33125 | -19.31875 | *Cichla piquiti* | 11-6-1992 | Biological colections UFMT UFMS |
| 33 | -57.38328867 | -18.64375 | *Cichla piquiti* | 11-7-1992 | Biological colections UFMT UFMS |
| 34 | -55.06458333 | -17.56700155 | *Cichla piquiti* | 11-8-1992 | Biological colections UFMT UFMS |
| 35 | -54.98892695 | -17.63125 | *Cichla piquiti* | 11-9-1992 | Biological colections UFMT UFMS |
| 36 | -55.4945702 | -17.33541667 | *Cichla piquiti* | 11-10-1992 | Biological colections UFMT UFMS |
| 37 | -55.95983859 | -17.27708333 | *Cichla piquiti* | 11-11-1992 | Biological colections UFMT UFMS |
| 38 | -57.33068632 | -18.13958333 | *Cichla piquiti* | 11-12-1992 | Biological colections UFMT UFMS |
| 39 | -57.36458333 | -18.13541667 | *Cichla piquiti* | 11-13-1992 | Biological colections UFMT UFMS |
| 40 | -57.34218893 | -18.18281107 | *Cichla piquiti* | 11-14-1992 | Biological colections UFMT UFMS |
| 41 | -57.29791667 | -18.18541667 | *Cichla piquiti* | 11-15-1992 | Biological colections UFMT UFMS |
| 42 | -57.38958333 | -18.18860328 | *Cichla piquiti* | 11-16-1992 | Biological colections UFMT UFMS |
| 43 | -57.40139873 | -18.12776794 | *Cichla piquiti* | 11-17-1992 | Biological colections UFMT UFMS |
| 44 | -57.31041667 | -18.81932495 | *Cichla piquiti* | 11-18-1992 | Biological colections UFMT UFMS |
| 45 | -55.38125 | -14.83570278 | *Cichla kelberi* | 4-26-2014 | Field Fishers Interviews |
| 46 | -55.68504128 | -15.10245872 | *Cichla kelberi* | 5-30-2014 | Field Fishers Interviews |
| 47 | -58.47158382 | -15.82424952 | *Cichla kelberi* | 12-15-2018 | Field Fishers Interviews |
| 48 | -58.43541667 | -15.86458333 | *Cichla kelberi* | 12-15-2018 | Field Fishers Interviews |
| 49 | -58.54375 | -15.85625 | *Cichla kelberi* | 12-15-2018 | Field Fishers Interviews |
| 50 | -54.79278186 | -19.81361519 | *Cichla kelberi* | 5-13-2019 | Field Fishers Interviews |
| 51 | -55.04375 | -19.48958333 | *Cichla kelberi* | 5-14-2019 | Field Fishers Interviews |
| 52 | -55.66875 | -14.80185284 | *Cichla kelberi* | 6-22-2019 | Field Fishers Interviews |
| 53 | -54.79278186 | -19.81361519 | *Cichla piquiti* | 5-13-2019 | Field Fishers Interviews |
| 54 | -55.04375 | -19.48958333 | *Cichla piquiti* | 5-14-2019 | Field Fishers Interviews |
| 55 | -54.56636204 | -19.38780463 | *Cichla piquiti* | 5-15-2019 | Field Fishers Interviews |
| 56 | -54.56247189 | -19.40413855 | *Cichla piquiti* | 5-15-2019 | Field Fishers Interviews |
| 57 | -54.58798 | -19.38125 | *Cichla piquiti* | 5-15-2019 | Field Fishers Interviews |
| 58 | -56.23958333 | -21.33958333 | *Cichla piquiti* | 5-23-2019 | Field Fishers Interviews |
| 59 | -56.39282354 | -21.41782354 | *Cichla piquiti* | 5-24-2019 | Field Fishers Interviews |
| 60 | -56.14791667 | -21.33541667 | *Cichla piquiti* | 5-24-2019 | Field Fishers Interviews |
| 61 | -57.02257849 | -22.01075484 | *Cichla piquiti* | 5-23-2019 | Field Fishers Interviews |
| 62 | -56.36458333 | -21.29791667 | *Cichla piquiti* | 5-23-2019 | Field Fishers Interviews |
| 63 | -57.03125 | -21.98958333 | *Cichla piquiti* | 5-23-2019 | Field Fishers Interviews |
| 64 | -56.06041667 | -22.10625 | *Cichla piquiti* | 5-22-2019 | Field Fishers Interviews |
| 65 | -57.06041667 | -22.08139018 | *Cichla piquiti* | 5-23-2019 | Field Fishers Interviews |
| 66 | -56.86458333 | -21.97708333 | *Cichla piquiti* | 5-22-2019 | Field Fishers Interviews |
| 67 | -56.47708333 | -21.12708333 | *Cichla piquiti* | 5-24-2019 | Field Fishers Interviews |
| 68 | -56.03859406 | -22.24375 | *Cichla piquiti* | 5-22-2019 | Field Fishers Interviews |
| 69 | -56.47291667 | -21.11041667 | *Cichla piquiti* | 5-24-2019 | Field Fishers Interviews |
| 70 | -54.95426552 | -19.50009886 | *Oreochromis niloticus* | 5-14-2019 | Field Fishers Interviews |
| 71 | -54.91041667 | -19.52410805 | *Oreochromis niloticus* | 5-14-2019 | Field Fishers Interviews |
| 72 | -54.57111313 | -19.35805354 | *Oreochromis niloticus* | 5-15-2019 | Field Fishers Interviews |
| 73 | -54.99900053 | -19.5843328 | *Oreochromis niloticus* | 5-16-2019 | Field Fishers Interviews |
| 74 | -56.14791667 | -21.33541667 | *Oreochromis niloticus* | 5-24-2019 | Field Fishers Interviews |
| 75 | -57.02257849 | -22.01075484 | *Oreochromis niloticus* | 5-23-2019 | Field Fishers Interviews |
| 76 | -56.40045958 | -14.89629292 | *Oreochromis niloticus* | 5-23-2019 | Field Fishers Interviews |
| 77 | -56.21129962 | -21.28629962 | *Oreochromis niloticus* | 5-24-2019 | Field Fishers Interviews |
| 78 | -56.06041667 | -22.10625 | *Oreochromis niloticus* | 5-22-2019 | Field Fishers Interviews |
| 79 | -56.56733252 | -22.12850081 | *Oreochromis niloticus* | 5-22-2019 | Field Fishers Interviews |
| 80 | -57.04791667 | -21.96875 | *Oreochromis niloticus* | 5-22-2019 | Field Fishers Interviews |
| 81 | -57.06041667 | -22.08139018 | *Oreochromis niloticus* | 5-23-2019 | Field Fishers Interviews |
| 82 | -56.86458333 | -21.97708333 | *Oreochromis niloticus* | 5-22-2019 | Field Fishers Interviews |
| 83 | -56.47708333 | -21.12708333 | *Oreochromis niloticus* | 5-24-2019 | Field Fishers Interviews |
| 84 | -56.52094385 | -22.12094385 | *Oreochromis niloticus* | 5-22-2019 | Field Fishers Interviews |
| 85 | -56.47291667 | -21.11041667 | *Oreochromis niloticus* | 5-24-2019 | Field Fishers Interviews |
| 86 | -54.29892518 | -18.66458333 | *Oreochromis niloticus* | 6-20-2018 | Field Fishers Interviews |
| 87 | -54.17959615 | -18.64626282 | *Oreochromis niloticus* | 6-20-2018 | Field Fishers Interviews |
| 223 | -57.90053487 | -15.9838682 | *Cichla kelberi* | 7-18-2019 | Instagram georeferenced photos/interviews |
| 224 | -57.89375 | -15.95625 | *Cichla kelberi* | 7-18-2019 | Instagram georeferenced photos/interviews |
| 225 | -57.8767964 | -15.97262973 | *Cichla kelberi* | 7-18-2019 | Instagram georeferenced photos/interviews |
| 226 | -57.93252546 | -15.88681942 | *Cichla kelberi* | 7-18-2019 | Instagram georeferenced photos/interviews |
| 227 | -57.97708333 | -15.97558102 | *Cichla kelberi* | 7-18-2019 | Instagram georeferenced photos/interviews |
| 228 | -57.92573258 | -16.02843409 | *Cichla kelberi* | 7-18-2019 | Instagram georeferenced photos/interviews |
| 229 | -57.82149314 | -16.02982648 | *Cichla kelberi* | 7-18-2019 | Instagram georeferenced photos/interviews |
| 230 | -57.81458333 | -16.00625 | *Cichla kelberi* | 7-18-2019 | Instagram georeferenced photos/interviews |
| 231 | -57.56520428 | -15.85553143 | *Cichla kelberi* | 7-18-2019 | Instagram georeferenced photos/interviews |
| 232 | -58.05836289 | -15.69169622 | *Cichla kelberi* | 7-18-2019 | Instagram georeferenced photos/interviews |
| 233 | -58.08125 | -15.70208333 | *Cichla kelberi* | 7-18-2019 | Instagram georeferenced photos/interviews |
| 234 | -58.09375 | -15.72291667 | *Cichla kelberi* | 7-18-2019 | Instagram georeferenced photos/interviews |
| 235 | -58.39689621 | -15.88227046 | *Cichla kelberi* | 7-18-2019 | Instagram georeferenced photos/interviews |
| 236 | -57.79375 | -16.27434095 | *Cichla kelberi* | 7-18-2019 | Instagram georeferenced photos/interviews |
| 237 | -57.35261664 | -16.8191837 | *Cichla kelberi* | 7-18-2019 | Instagram georeferenced photos/interviews |
| 238 | -57.78541667 | -16.33125 | *Cichla kelberi* | 7-18-2019 | Instagram georeferenced photos/interviews |
| 239 | -57.65625 | -16.86041667 | *Cichla kelberi* | 7-18-2019 | Instagram georeferenced photos/interviews |
| 240 | -57.72708333 | -16.16041667 | *Cichla kelberi* | 7-18-2019 | Instagram georeferenced photos/interviews |
| 241 | -57.26875 | -17.92708333 | *Cichla piquiti* | 7-18-2019 | Instagram georeferenced photos/interviews |
| 242 | -54.81406237 | -17.59322904 | *Cichla piquiti* | 7-18-2019 | Instagram georeferenced photos/interviews |
| 243 | -54.74375 | -17.51875 | *Cichla piquiti* | 7-18-2019 | Instagram georeferenced photos/interviews |
| 244 | -54.75638087 | -17.56054754 | *Cichla piquiti* | 7-18-2019 | Instagram georeferenced photos/interviews |
| 245 | -54.71879326 | -17.57291667 | *Cichla piquiti* | 7-18-2019 | Instagram georeferenced photos/interviews |
| 246 | -54.81458333 | -17.10208333 | *Cichla piquiti* | 7-18-2019 | Instagram georeferenced photos/interviews |
| 247 | -54.82760891 | -17.09725656 | *Cichla piquiti* | 7-18-2019 | Instagram georeferenced photos/interviews |
| 248 | -54.82708333 | -17.09739747 | *Cichla piquiti* | 7-18-2019 | Instagram georeferenced photos/interviews |
| 249 | -54.45366494 | -17.92708333 | *Cichla piquiti* | 7-18-2019 | Instagram georeferenced photos/interviews |
| 250 | -54.92863512 | -17.94636488 | *Cichla piquiti* | 7-18-2019 | Instagram georeferenced photos/interviews |
| 251 | -53.88936026 | -17.58519359 | *Cichla piquiti* | 7-18-2019 | Instagram georeferenced photos/interviews |
| 252 | -54.47424975 | -19.41458333 | *Cichla piquiti* | 7-18-2019 | Instagram georeferenced photos/interviews |
| 253 | -54.4460412 | -19.4164588 | *Cichla piquiti* | 7-18-2019 | Instagram georeferenced photos/interviews |
| 254 | -54.52068099 | -19.47098568 | *Cichla piquiti* | 7-18-2019 | Instagram georeferenced photos/interviews |
| 255 | -54.50130371 | -19.41380371 | *Cichla piquiti* | 7-18-2019 | Instagram georeferenced photos/interviews |
| 256 | -55.44844305 | -17.33177639 | *Cichla piquiti* | 7-18-2019 | Instagram georeferenced photos/interviews |
| 257 | -55.44120949 | -17.32454282 | *Cichla piquiti* | 7-18-2019 | Instagram georeferenced photos/interviews |
| 258 | -57.37291667 | -18.74375 | *Cichla piquiti* | 7-18-2019 | Instagram georeferenced photos/interviews |
| 259 | -57.37291667 | -18.72996612 | *Cichla piquiti* | 7-18-2019 | Instagram georeferenced photos/interviews |
| 260 | -57.42291667 | -18.83541667 | *Cichla piquiti* | 7-18-2019 | Instagram georeferenced photos/interviews |
| 261 | -57.18194284 | -18.76458333 | *Cichla piquiti* | 7-18-2019 | Instagram georeferenced photos/interviews |
| 262 | -57.56647664 | -18.83541667 | *Cichla piquiti* | 7-18-2019 | Instagram georeferenced photos/interviews |
| 263 | -57.51601483 | -18.85351483 | *Cichla piquiti* | 7-18-2019 | Instagram georeferenced photos/interviews |
| 264 | -56.06458333 | -17.32291667 | *Cichla piquiti* | 7-18-2019 | Instagram georeferenced photos/interviews |
| 265 | -56.04491558 | -17.32408224 | *Cichla piquiti* | 7-18-2019 | Instagram georeferenced photos/interviews |
| 266 | -54.04672694 | -17.9866064 | *Cichla piquiti* | 7-18-2019 | Instagram georeferenced photos/interviews |
| 267 | -54.03541667 | -17.99375 | *Cichla piquiti* | 7-18-2019 | Instagram georeferenced photos/interviews |
| 268 | -54.06244417 | -17.9957775 | *Cichla piquiti* | 7-18-2019 | Instagram georeferenced photos/interviews |
| 269 | -54.05770714 | -17.98687381 | *Cichla piquiti* | 7-18-2019 | Instagram georeferenced photos/interviews |
| 270 | -54.94791667 | -16.16041667 | *Cichla piquiti* | 7-18-2019 | Instagram georeferenced photos/interviews |
| 271 | -54.93958333 | -16.13125 | *Cichla piquiti* | 7-18-2019 | Instagram georeferenced photos/interviews |
| 272 | -56.50835826 | -17.29375 | *Cichla piquiti* | 7-18-2019 | Instagram georeferenced photos/interviews |
| 273 | -56.47708333 | -17.31875 | *Cichla piquiti* | 7-18-2019 | Instagram georeferenced photos/interviews |
| 274 | -55.26582419 | -16.43131338 | *Cichla piquiti* | 7-18-2019 | Instagram georeferenced photos/interviews |
| 275 | -55.84371158 | -19.51454491 | *Cichla piquiti* | 7-18-2019 | Instagram georeferenced photos/interviews |
| 276 | -55.8530478 | -19.59201143 | *Cichla piquiti* | 7-18-2019 | Instagram georeferenced photos/interviews |
| 277 | -58.05208333 | -15.58541667 | *Oreochromis niloticus* | 7-18-2019 | Instagram georeferenced photos/interviews |
| 278 | -58.05409223 | -15.48958333 | *Oreochromis niloticus* | 7-18-2019 | Instagram georeferenced photos/interviews |
| 279 | -56.69791667 | -20.11736211 | *Oreochromis niloticus* | 7-18-2019 | Instagram georeferenced photos/interviews |
| 280 | -55.0920335 | -17.15870017 | *Oreochromis niloticus* | 7-18-2019 | Instagram georeferenced photos/interviews |
| 281 | -55.0025462 | -16.28171287 | *Oreochromis niloticus* | 7-18-2019 | Instagram georeferenced photos/interviews |
| 282 | -55.86234405 | -20.30208333 | *Oreochromis niloticus* | 7-18-2019 | Instagram georeferenced photos/interviews |

**SM-6.** The Interviewer used the semi-structured Interview's schematic design to obtain information about the introduced species.

| **Interview #____** | | | | | | | |
| --- | --- | --- | --- | --- | --- | --- | --- |
| Point: | | | | Date: | | | |
| Latitude: | | | | Longitude: | | | |
| Description: | | | | | | | |
| City/Municipality: | | | | River: | | | |
| **Questions** | | | | | | | |
| **1.** What is your name (optional) and age? | | | | | | | |
| **2.** Is this fish present here? (Show photos) | | | Present (**1**) Absent(**0**) | **3.** Reproduction (Yes/No) | **5.** Maximum size | **6.** Abundance | **7.** Time |
| **Introduced species** | 2.1 | Yellow peacock bass |  |  |  |  |  |
| 2.2 | Blue peacock bass |  |  |  |  |  |
| 2.3 | Tilapia |  |  |  |  |  |
| 2.4 | Tambacú |  |  |  |  |  |
| 2.5 | Roosterfish (Fake) |  |  |  |  |  |
| **3.** This fish reproduce here or nearby here? | | | | | | | |
| **4.** How long is the reproductive season here? | | | | | | | |
| **5.** What is the size (weight (g) or length (cm)) of the largest fish caught during its life, and in what year did it catch? | | | | | | | |
| **6.** What is the largest catch (number of individuals caught) in a single 1-day fishery and the year of that catch? | | | | | | | |
| **7.** If one of these species is now part of the region's fisheries, how long has it been in catches (months)? | | | | | | | |

**SM-7.** The pictures used showed the IAS fishes present in the basin in addition to a non-present species.

**
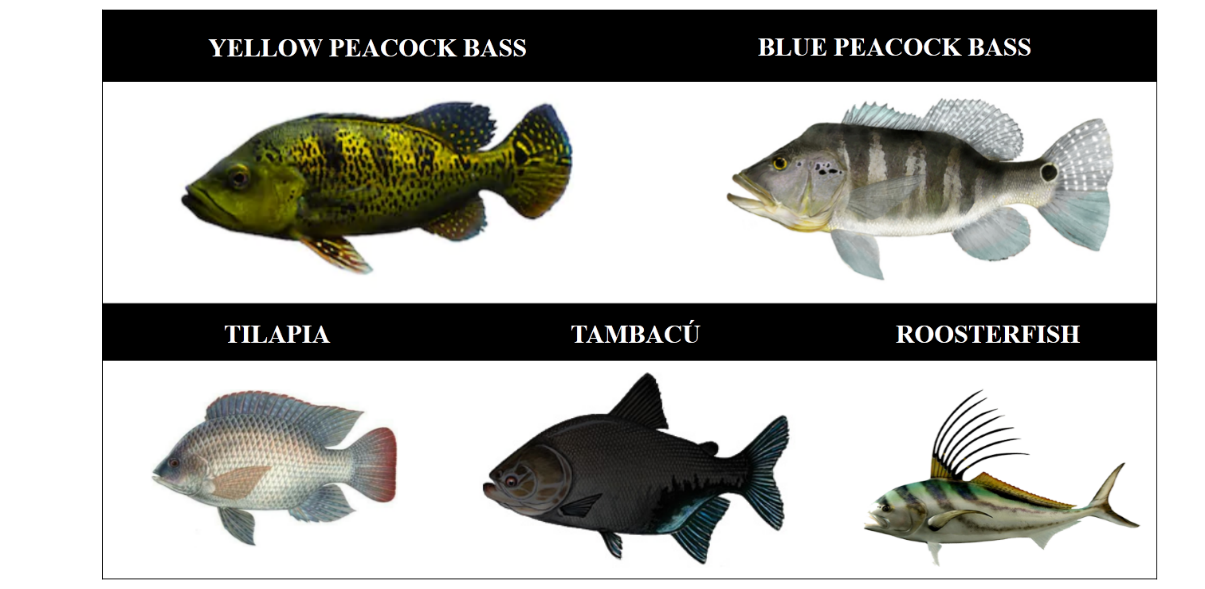
**

We used representations of IAS fishes, including photos, illustrations, and common names. A cross-validation of the interviews involved representations of common fish species absent in the basin, avoiding false-positive occurrence records.

**SM-8a.** Maps habitat-suitability *O. Niloticus* in its native area (right) and its invaded range (study area) (based on binary projections from the ensemble of Ecological Niche Models (ENMs): Generalized Linear Models (GLM), Random Forest (RF), and Maximum Entropy (MaxEnt)).


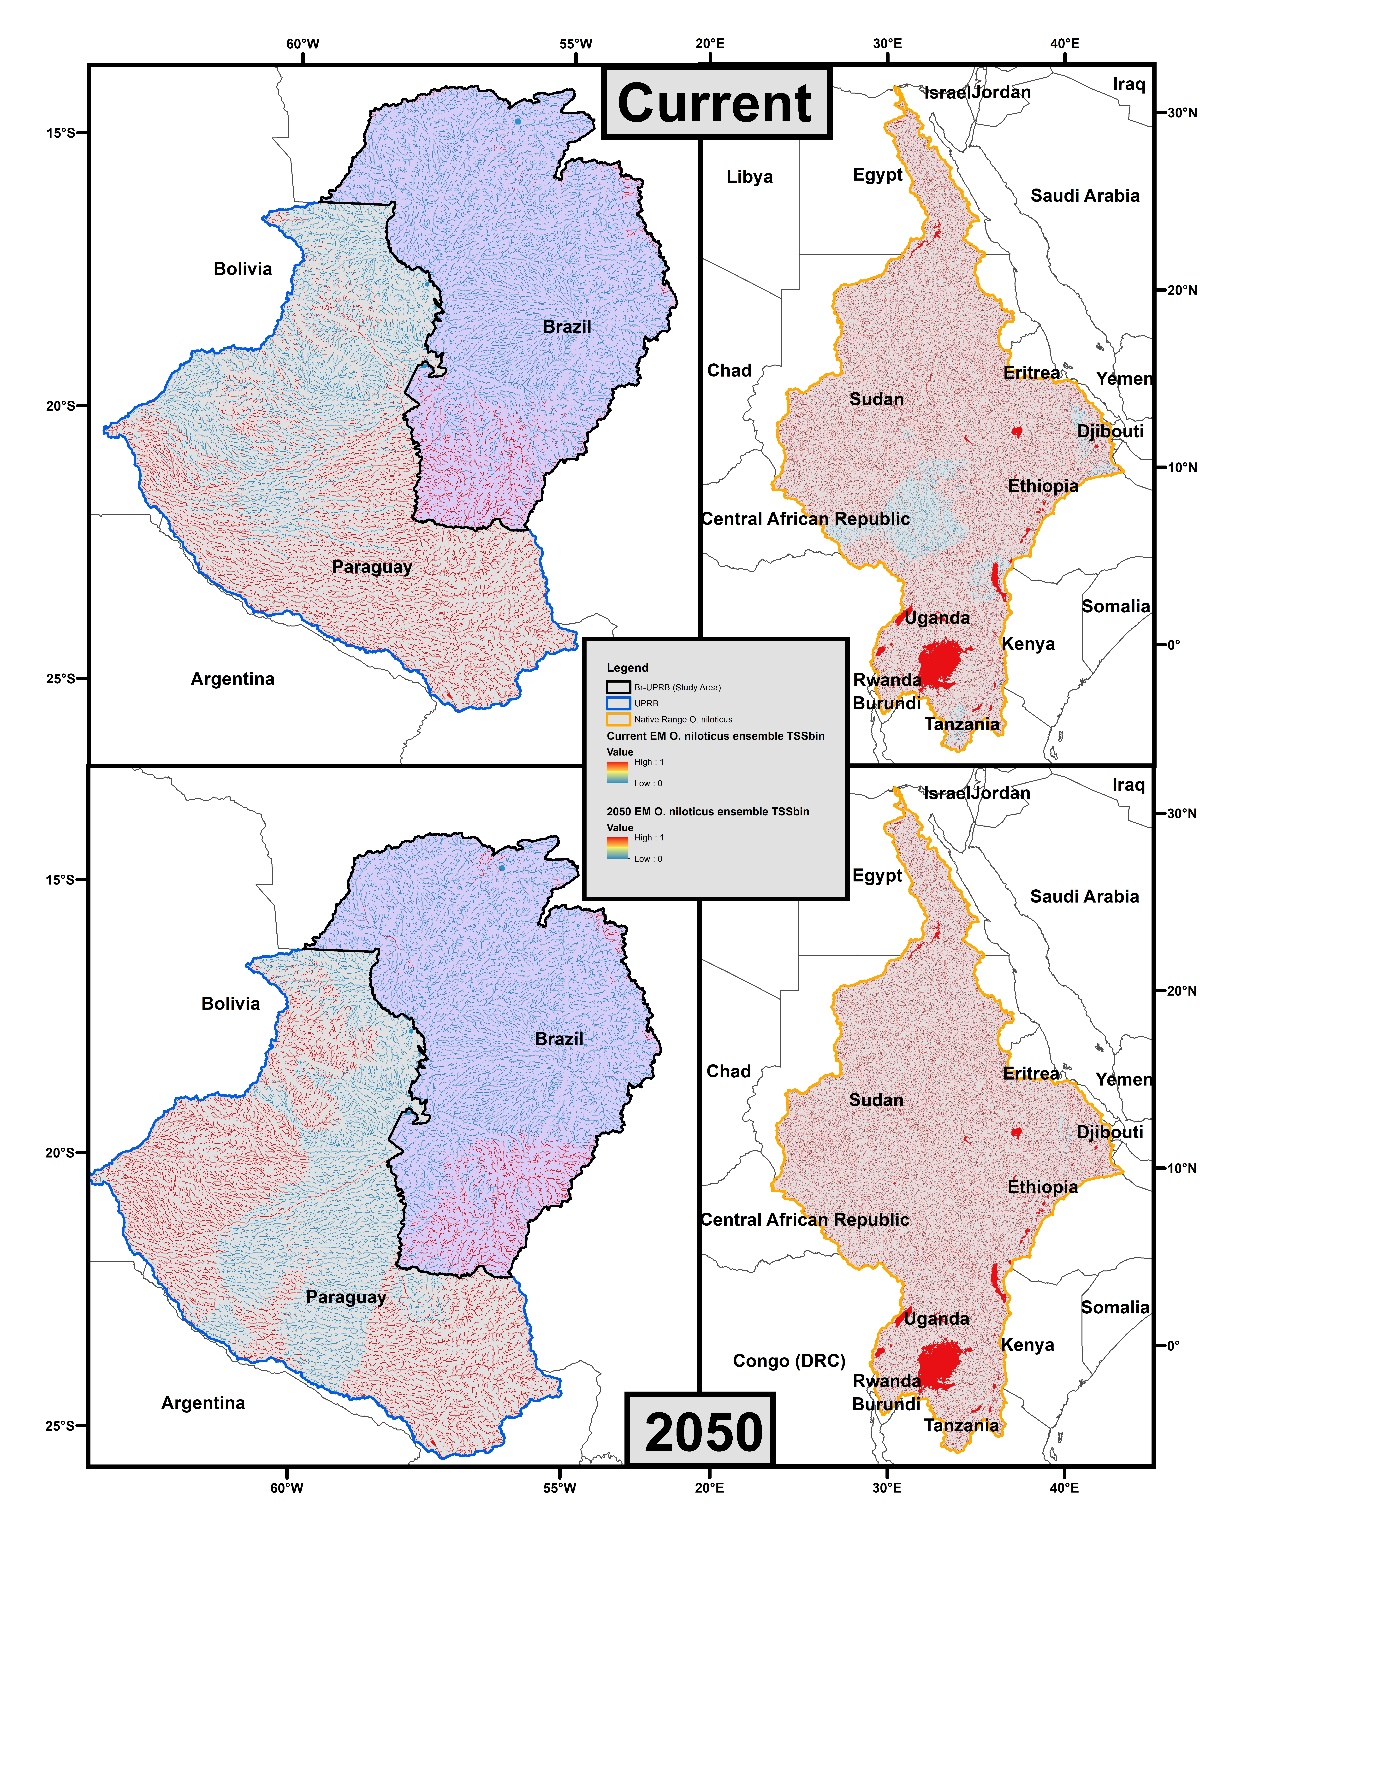


**SM-8b.** Maps habitat-suitability *C. kelberi* in its native area (right) and its invaded range (study area (based on binary projections from the ensemble of Ecological Niche Models (ENMs): Generalized Linear Models (GLM), Random Forest (RF), and Maximum Entropy (MaxEnt)).


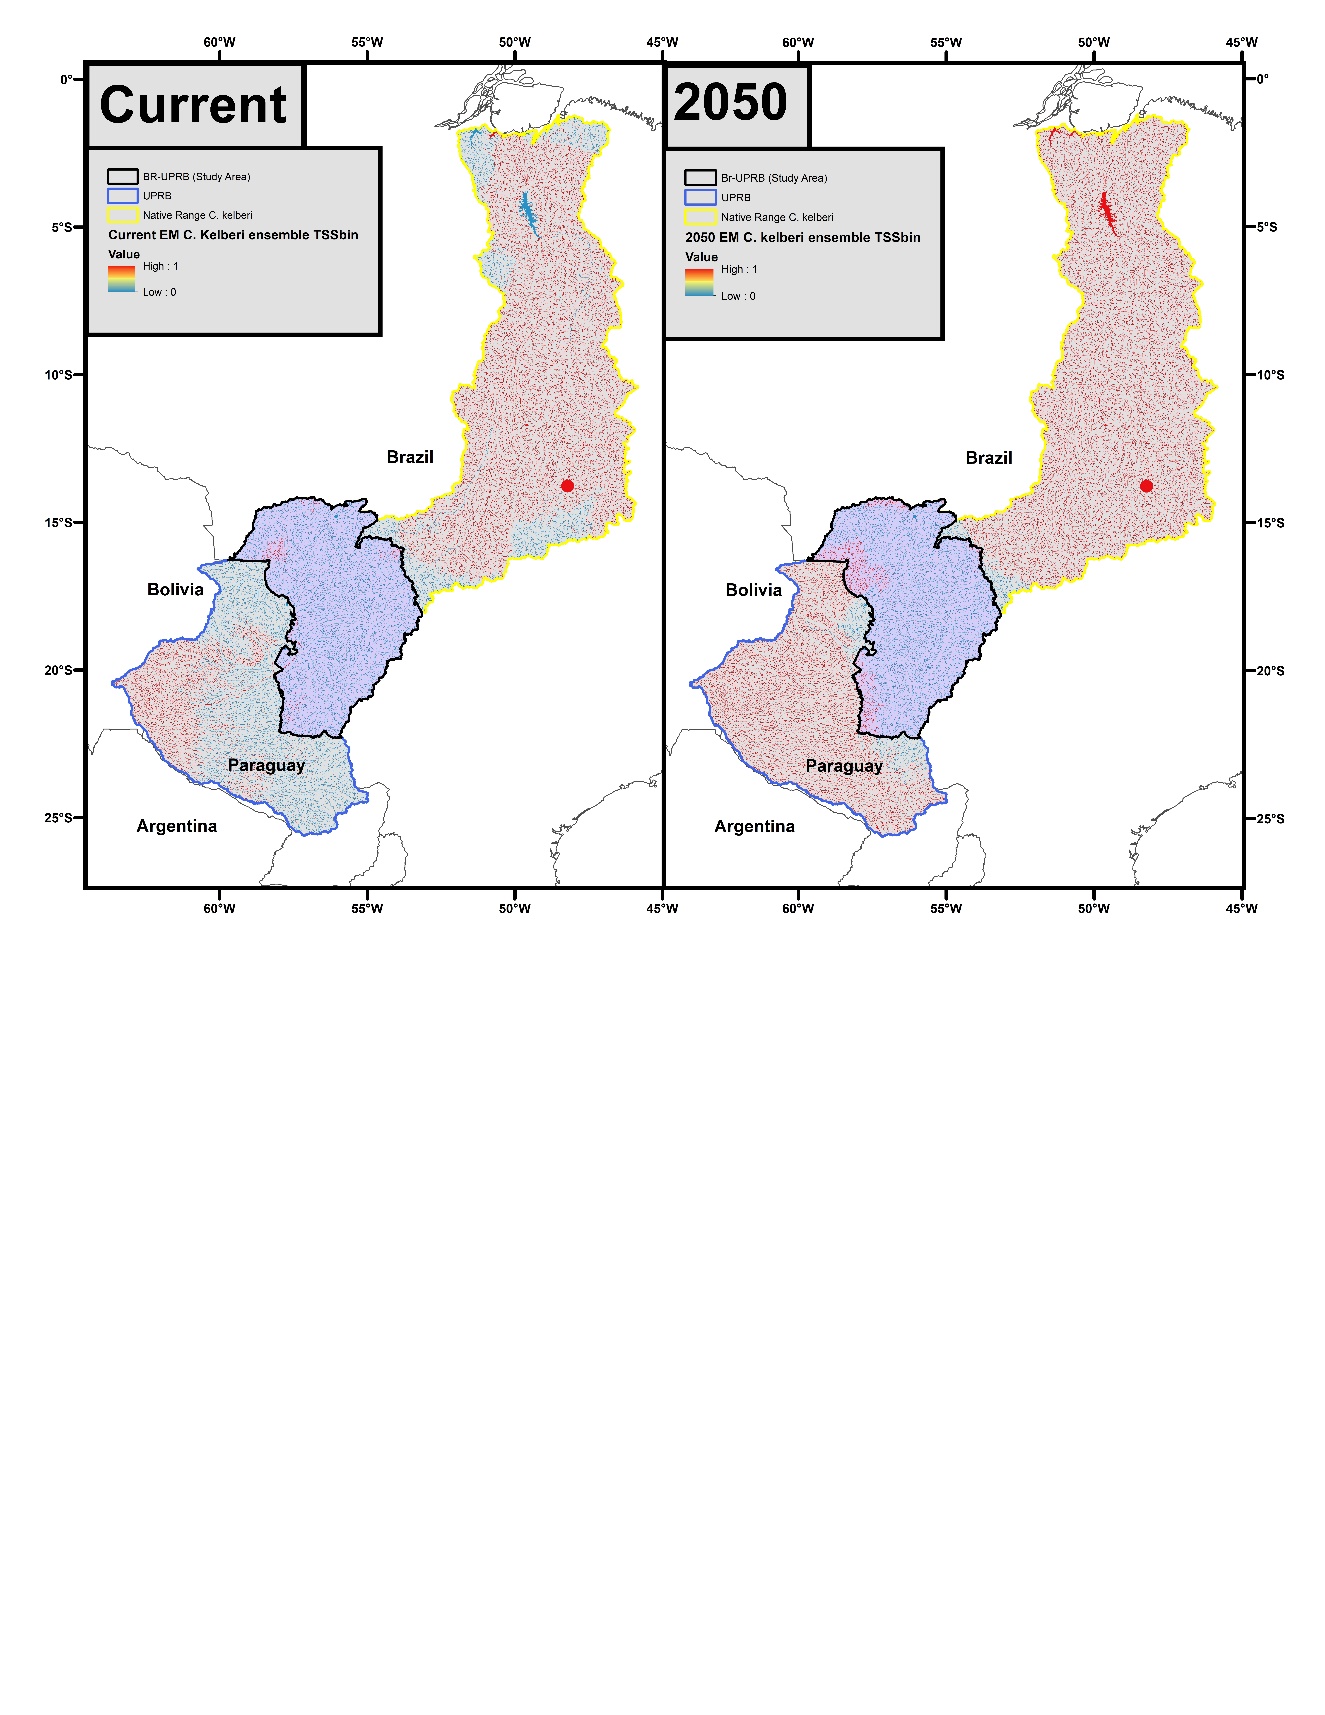


**SM-8c.** Maps habitat-suitability *C. piquiti* in its native area (right) and its invaded range (study area) (based on binary projections from the ensemble of Ecological Niche Models (ENMs): Generalized Linear Models (GLM), Random Forest (RF), and Maximum Entropy (MaxEnt)).


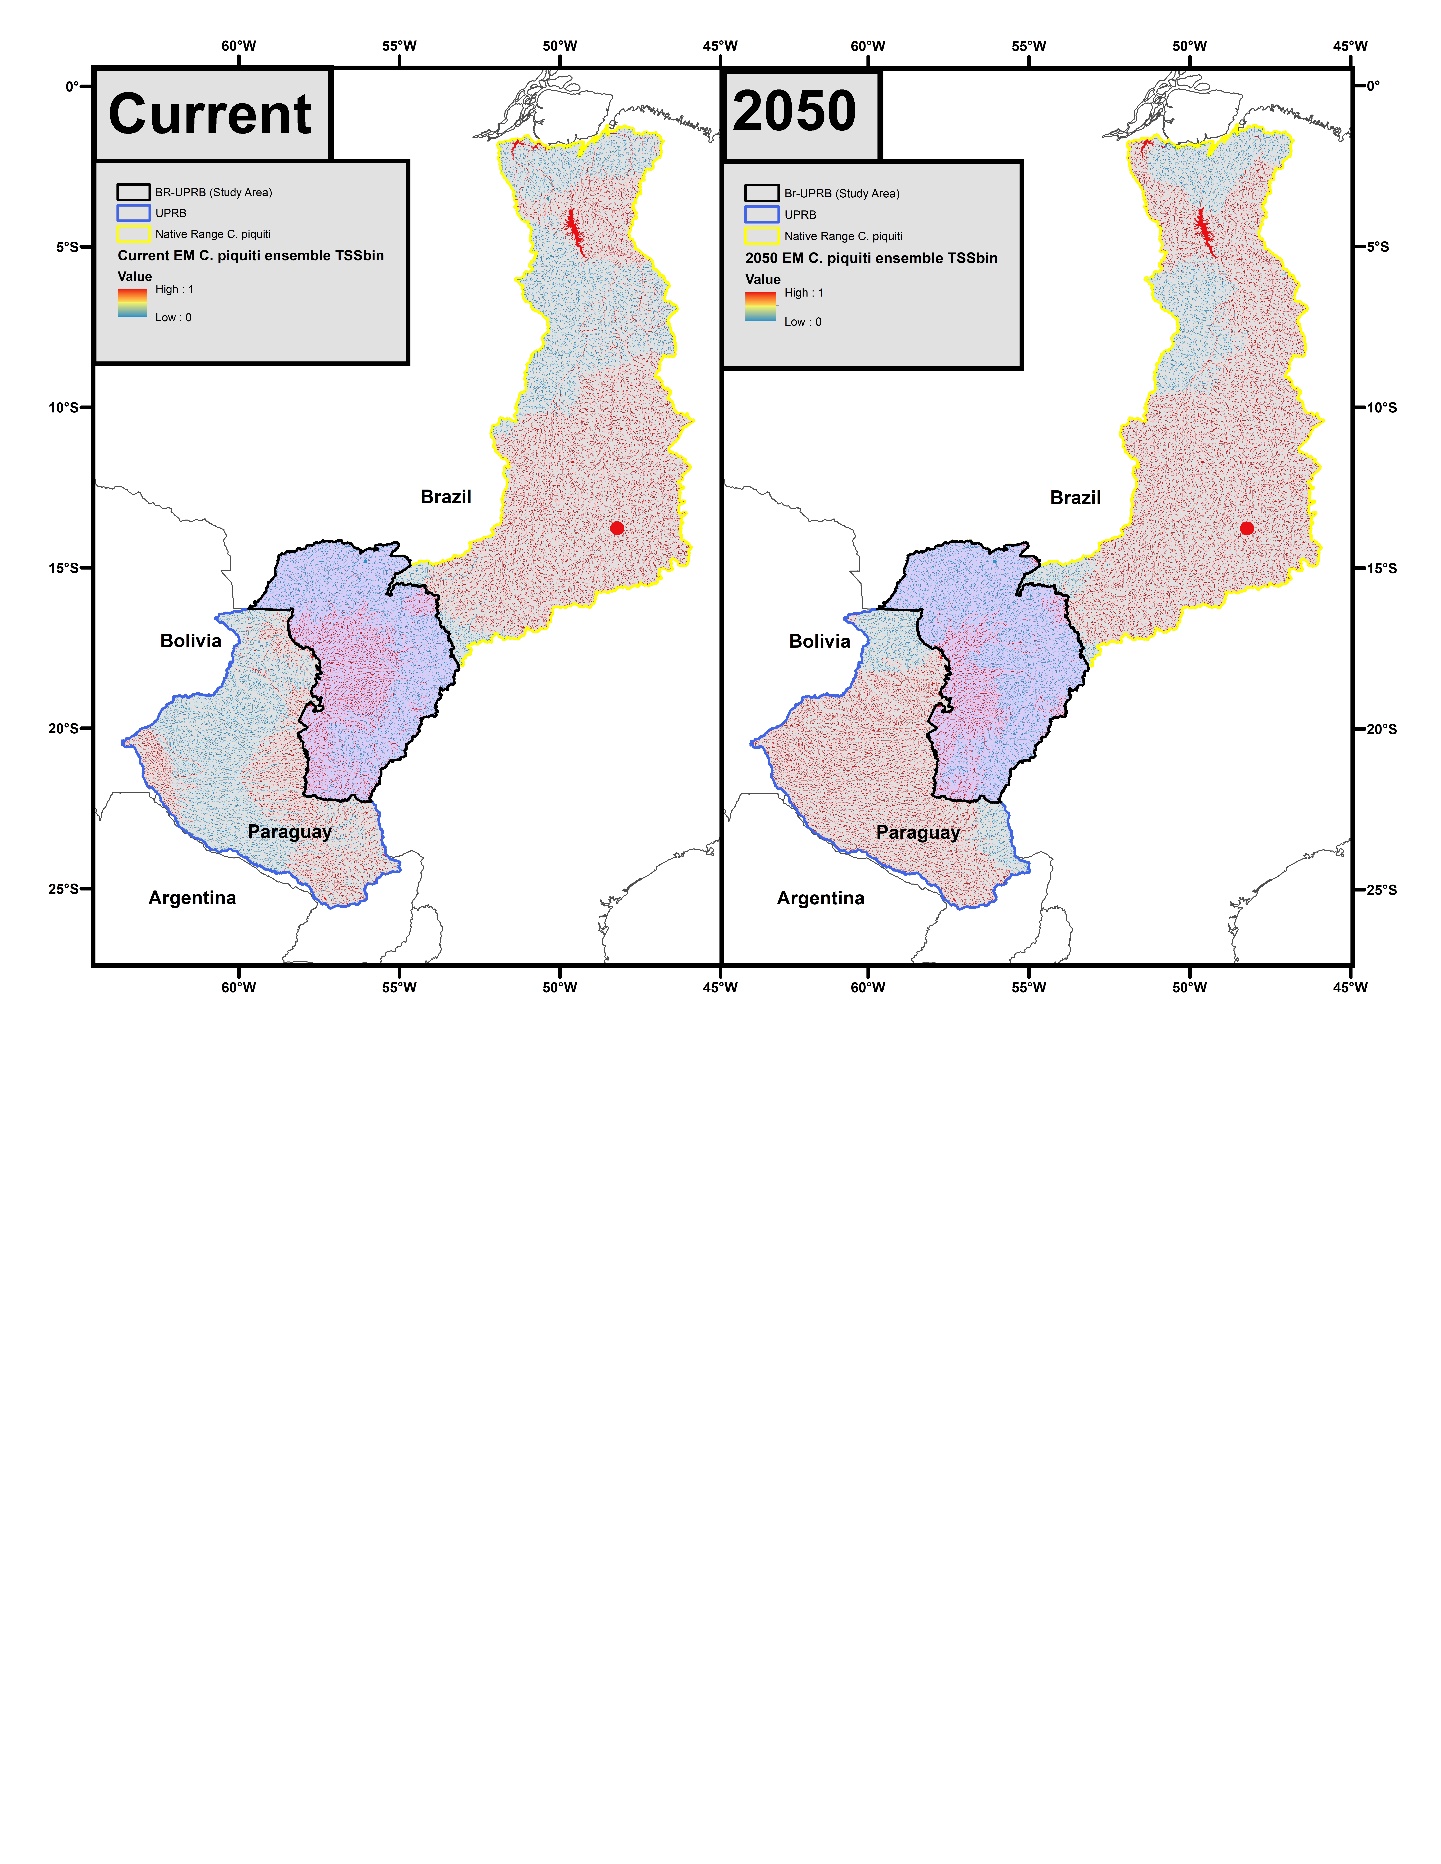


**SM-9a.** Function RangeSize from biomod2 R Package

This function allows us to calculate the absolute number of locations (pixels) lost, stable, and gained, as well as the corresponding relative proportions, between two binary projections of (ensemble) ecological niche models (which can represent new time scales or environmental scenarios, for example).

The selected models' probability is first transformed into binary data according to the thresholds defined when building the **model.output** object with the **BIOMOD_Modeling** function, maximizing the evaluation metric score over the testing dataset. The committee's averaging score is obtained by taking the average of these binary predictions. It is built on the analogy of a simple vote: each single model votes for the species being either present (**1**) or absent (**0**) the sum of 1 is then divided by the number of single models voting. This function is only relevant to compare binary projections, made on the same area with the same resolution.

**Comparison between proj.current and proj.future depends on the number of projections in both objects:**

| proj.current | proj.future | **Comparison** |
| --- | --- | --- |
| **1 projection** (*e.g. data.frame with 1 column, SpatRaster with 1 layer*) | **1 projection** (*e.g. data.frame with 1 column, SpatRaster with 1 layer*) | comparison of both projection (*e.g. current vs future conditions for the same model ; current vs current condition for two different models*) |
| **n projections** (*e.g. data.frame with n column, SpatRaster with n layer*) | **n projections** (*e.g. data.frame with n column, SpatRaster with n layer*) | comparing projection i in proj.current to projection i in proj.future (*e.g. comparing current vs future condition for n models*) |
| **1 projection** (*e.g. data.frame with 1 column, SpatRaster with 1 layer*) | **n projections** (*e.g. data.frame with n column, SpatRaster with n layer*) | comparing projection in proj.current to each projection in proj.future (*e.g. comparing current vs n different future condition (e.g. climate change scenario) for 1 model*) |

Diff.By.Pixel object is obtained by applying the following formula:

***proj*.*future*−2∗*proj*.*current***

A list containing two objects:

Compt.By.Species a data.frame containing the summary of range change for each comparison.

- Loss: number of pixels predicted to be lost
- Stable0: number of pixels not currently occupied and not predicted to be
- Stable1: number of pixels currently occupied and predicted to remain occupied
- Gain: number of pixels predicted to be gained
- PercLoss: percentage of pixels currently occupied and predicted to be lost (Loss / (Loss + Stable1))
- PercGain: percentage of pixels predicted to be gained compared to the number of pixels currently occupied (Gain / (Loss + Stable1))
- SpeciesRangeChange: percentage of pixels predicted to change (loss or gain) compare to the number of pixels currently occupied (PercGain - PercLoss)
- CurrentRangeSize: number of pixels currently occupied
- FutureRangeSize0Disp: number of pixels predicted to be occupied, assuming no migration
- FutureRangeSize1Disp: number of pixels predicted to be occupied, assuming migration

Diff.By.Pixel

an object in the same form than the input data (proj.current and proj.future) and containing a value for each point/pixel of each comparison among:

- -2: predicted to be lost.
- -1: predicted to remain occupied.
- 0: predicted to remain unoccupied.
- 1: predicted to be gained.

**SM-9b.** Potential suitable habitat (number of predictedcells) of the species predicted to current time and 2050 under climate change. Highlighted are IAS fish species that will gain habitat in the future. 1 pixel = 1 km2.

| **Spp ID** | **Species** | **BIOMOD**  **RangeSize** | **Loss** | **Stable0** | **Stable1** | **Gain** | **Perc**  **Loss** | **Perc**  **Gain** | **Species Range Change** | **Current Range Size** | **Future RangeSize NoDisp** | **Future RangeSize. FullDisp** |
| --- | --- | --- | --- | --- | --- | --- | --- | --- | --- | --- | --- | --- |
| 1 | *Cichla piquiti* | Emca |  |  |  |  |  |  |  |  |  |  |
| 2 | *Cichla kelberi* | Emca |  |  |  |  |  |  |  |  |  |  |
| 3 | *Oreochromis niloticus* | Emca |  |  |  |  |  |  |  |  |  |  |

The predictive ensemble maps for the current and future (i.2050) were related to bioclimatic and topographic features. We extracted the environmental values of the grids corresponding to species presence from the current and future ensemble maps. Then, bar plots were drawn in R to compare the range values with the potential current and future habitats.

The model produces raster outputs with a 30 arc-second resolution, approximately 0.926 km² at latitudes near the equator. The potential invasion range values exhibit variation because of the substantial size of the study area and its distance from the equator (-15° to -22° S in the Br-UPRB). The results are presented in approximate values (≈ km²) rather than exact measurements 5.

## Supplementary Material References

1. ANA (Agência Nacional de Águas). 2018. Conjuntura dos Recursos Hídricos no Brasil. Available in: <http://www3.ana.gov.br/portal/ANA/as-12-regioes-hidrograficas-brasileiras/paraguai> Accessed 01 May 2018
2. Kullander, S. O., Ferreira, E. J. 2006. A review of the South American cichlid genus Cichla, with descriptions of nine new species (Teleostei: Cichlidae). Ichthyological Exploration of Freshwaters, 22(2), 185–192. Available in: <http://repositorio.inpa.gov.br/handle/123/2793> Accessed 17 July 2018
3. Domisch, S., Amatulli, G. & Jetz, W. Near-global freshwater-specific environmental variables for biodiversity analyses in 1 km resolution. Sci Data 2, 150073 (2015). <https://doi.org/10.1038/sdata.2015.73>
4. Booth, T.H., 2022. Checking bioclimatic variables that combine temperature and precipitation data before their use in species distribution models. Austral Ecology 47, 1506–1514. <https://doi.org/10.1111/aec.13234>
5. Lovelace, R., Nowosad, J., Muenchow, J., 2019. Geocomputation with R, 1st ed. Chapman and Hall/CRC. <https://doi.org/10.1201/9780203730058>
6. Fick, S. E. & Hijmans, R. J. WorldClim 2: new 1‐km spatial resolution climate surfaces for global land areas. Intl Journal of Climatology 37, 4302–4315 (2017).
